# Supplementary material for: Neurite density imaging in amygdala nuclei reveals interindividual differences in neuroticism
Source: PubMed Central journal article supplement (PMC8933246; doi:10.1002/hbm.25775), 2022-01-20
Supplement: HBM-43-2051-s001.pdf [file HBM-43-2051-s001.pdf]

| Sheet | Content                         |
|-------|---------------------------------|
|       | <b>T-Test</b>                   |
| 01    | INVF Amygdala + Amygdala nuclei |
| 02    | ODI Amygdala + Amygdala nuclei  |
| 03    | ISO Amygdala + Amygdala nuclei  |

| Regression |                    |                                                                                    |
|------------|--------------------|------------------------------------------------------------------------------------|
|            | Dependent Variable | Predictors                                                                         |
| 04         | Neuroticism        | Sex, Age, AAA_GMV, AB_GMV, Ba_GMV, Ce_GMV, Co_GMV, CAT_GMV, La_GMV, PL_GMV         |
| 05         | Neuroticism        | Sex, Age, AAA_INVF, AB_INVF, Ba_INVF, Ce_INVF, Co_INVF, CAT_INVF, La_INVF, PL_INVF |
| 06         | Neuroticism        | Sex, Age, AAA_ODI, AB_ODI, Ba_ODI, Ce_ODI, Co_ODI, CAT_ODI, La_ODI, PL_ODI         |
| 07         | Neuroticism        | Sex, Age, AAA_ISO, AB_ISO, Ba_ISO, Ce_ISO, Co_ISO, CAT_ISO, La_ISO, PL_ISO         |
| 08         | Anxiety            | Sex, Age, AAA_GMV, AB_GMV, Ba_GMV, Ce_GMV, Co_GMV, CAT_GMV, La_GMV, PL_GMV         |
| 09         | Anxiety            | Sex, Age, AAA_INVF, AB_INVF, Ba_INVF, Ce_INVF, Co_INVF, CAT_INVF, La_INVF, PL_INVF |
| 10         | Anxiety            | Sex, Age, AAA_ODI, AB_ODI, Ba_ODI, Ce_ODI, Co_ODI, CAT_ODI, La_ODI, PL_ODI         |
| 11         | Anxiety            | Sex, Age, AAA_ISO, AB_ISO, Ba_ISO, Ce_ISO, Co_ISO, CAT_ISO, La_ISO, PL_ISO         |
| 12         | Angry hostility    | Sex, Age, AAA_GMV, AB_GMV, Ba_GMV, Ce_GMV, Co_GMV, CAT_GMV, La_GMV, PL_GMV         |
| 13         | Angry hostility    | Sex, Age, AAA_INVF, AB_INVF, Ba_INVF, Ce_INVF, Co_INVF, CAT_INVF, La_INVF, PL_INVF |
| 14         | Angry hostility    | Sex, Age, AAA_ODI, AB_ODI, Ba_ODI, Ce_ODI, Co_ODI, CAT_ODI, La_ODI, PL_ODI         |
| 15         | Angry hostility    | Sex, Age, AAA_ISO, AB_ISO, Ba_ISO, Ce_ISO, Co_ISO, CAT_ISO, La_ISO, PL_ISO         |
| 16         | Depression         | Sex, Age, AAA_GMV, AB_GMV, Ba_GMV, Ce_GMV, Co_GMV, CAT_GMV, La_GMV, PL_GMV         |
| 17         | Depression         | Sex, Age, AAA_INVF, AB_INVF, Ba_INVF, Ce_INVF, Co_INVF, CAT_INVF, La_INVF, PL_INVF |
| 18         | Depression         | Sex, Age, AAA_ODI, AB_ODI, Ba_ODI, Ce_ODI, Co_ODI, CAT_ODI, La_ODI, PL_ODI         |
| 19         | Depression         | Sex, Age, AAA_ISO, AB_ISO, Ba_ISO, Ce_ISO, Co_ISO, CAT_ISO, La_ISO, PL_ISO         |
| 20         | Self-consciousness | Sex, Age, AAA_GMV, AB_GMV, Ba_GMV, Ce_GMV, Co_GMV, CAT_GMV, La_GMV, PL_GMV         |
| 21         | Self-consciousness | Sex, Age, AAA_INVF, AB_INVF, Ba_INVF, Ce_INVF, Co_INVF, CAT_INVF, La_INVF, PL_INVF |
| 22         | Self-consciousness | Sex, Age, AAA_ODI, AB_ODI, Ba_ODI, Ce_ODI, Co_ODI, CAT_ODI, La_ODI, PL_ODI         |
| 23         | Self-consciousness | Sex, Age, AAA_ISO, AB_ISO, Ba_ISO, Ce_ISO, Co_ISO, CAT_ISO, La_ISO, PL_ISO         |
| 24         | Impulsivity        | Sex, Age, AAA_GMV, AB_GMV, Ba_GMV, Ce_GMV, Co_GMV, CAT_GMV, La_GMV, PL_GMV         |
| 25         | Impulsivity        | Sex, Age, AAA_INVF, AB_INVF, Ba_INVF, Ce_INVF, Co_INVF, CAT_INVF, La_INVF, PL_INVF |
| 26         | Impulsivity        | Sex, Age, AAA_ODI, AB_ODI, Ba_ODI, Ce_ODI, Co_ODI, CAT_ODI, La_ODI, PL_ODI         |
| 27         | Impulsivity        | Sex, Age, AAA_ISO, AB_ISO, Ba_ISO, Ce_ISO, Co_ISO, CAT_ISO, La_ISO, PL_ISO         |
| 28         | Vulnerability      | Sex, Age, AAA_GMV, AB_GMV, Ba_GMV, Ce_GMV, Co_GMV, CAT_GMV, La_GMV, PL_GMV         |
| 29         | Vulnerability      | Sex, Age, AAA_INVF, AB_INVF, Ba_INVF, Ce_INVF, Co_INVF, CAT_INVF, La_INVF, PL_INVF |
| 30         | Vulnerability      | Sex, Age, AAA_ODI, AB_ODI, Ba_ODI, Ce_ODI, Co_ODI, CAT_ODI, La_ODI, PL_ODI         |
| 31         | Vulnerability      | Sex, Age, AAA_ISO, AB_ISO, Ba_ISO, Ce_ISO, Co_ISO, CAT_ISO, La_ISO, PL_ISO         |

| Correlation |                        |
|-------------|------------------------|
| 32          | GMV + INV F (Age, Sex) |
| 33          | GMV + ODI (Age, Sex)   |

| Key                                             |                                    |                         |
|-------------------------------------------------|------------------------------------|-------------------------|
| Neuroimaging measures                           |                                    |                         |
| GMV                                             | Gray matter volume                 | Macrostructural measure |
| INVF                                            | Intra neurite volume fraction      |                         |
| ODI                                             | Orientation dispersion index       |                         |
| ISO                                             | Isotropic diffusion                | Microstructural measure |
| Amygdala Nuclei according to Saygin et al. 2017 |                                    |                         |
| AAA                                             | Anterior amygdala area             |                         |
| AB                                              | Accessory basal nucleus            |                         |
| Ba                                              | Basal nucleus                      |                         |
| Ce                                              | Central nucleus                    |                         |
| Co                                              | Cortical nucleus                   |                         |
| CAT                                             | Cortico-amygdaloid transition area |                         |
| La                                              | Lateral nucleus                    |                         |
| PL                                              | Paralaminar nucleus                |                         |

| Group Statistics |        |         |       |       |            |
|------------------|--------|---------|-------|-------|------------|
| Sex              |        | N       | Mean  | SD    | SE of Mean |
| AMYG_INVF        | male   | 115,000 | 0,339 | 0,014 | 0,001      |
|                  | female | 106,000 | 0,324 | 0,014 | 0,001      |
| AAA_INVF         | male   | 115,000 | 0,317 | 0,020 | 0,002      |
|                  | female | 106,000 | 0,300 | 0,018 | 0,002      |
| AB_INVF          | male   | 115,000 | 0,264 | 0,059 | 0,005      |
|                  | female | 105,000 | 0,237 | 0,066 | 0,006      |
| Ba_INVF          | male   | 115,000 | 0,330 | 0,016 | 0,001      |
|                  | female | 106,000 | 0,317 | 0,013 | 0,001      |
| Ce_INVF          | male   | 115,000 | 0,338 | 0,046 | 0,004      |
|                  | female | 106,000 | 0,302 | 0,059 | 0,006      |
| Co_INVF          | male   | 115,000 | 0,341 | 0,040 | 0,004      |
|                  | female | 106,000 | 0,324 | 0,033 | 0,003      |
| CAT_INVF         | male   | 112,000 | 0,311 | 0,091 | 0,009      |
|                  | female | 101,000 | 0,287 | 0,083 | 0,008      |
| La_INVF          | male   | 115,000 | 0,344 | 0,016 | 0,001      |
|                  | female | 106,000 | 0,326 | 0,018 | 0,002      |
| PL_INVF          | male   | 114,000 | 0,290 | 0,069 | 0,006      |
|                  | female | 106,000 | 0,285 | 0,060 | 0,006      |

N = sample size, SD = standard deviation, SE = standard error

| Independent Samples Test |                             |                    |       |                              |         |       |                 |            |                |       |
|--------------------------|-----------------------------|--------------------|-------|------------------------------|---------|-------|-----------------|------------|----------------|-------|
|                          |                             | Levene's Tests for |       | t-test for Equality of Means |         |       |                 |            |                |       |
|                          |                             | F                  | p     | t                            | df      | p     | Mean Difference | SE of Mean | 95% Confidence |       |
|                          |                             |                    |       |                              |         |       |                 |            | Lower          | Upper |
| AMYG_INVF                | Equal variances assumed     | 0,165              | 0,685 | 8,242                        | 219,000 | 0,000 | 0,015           | 0,002      | 0,012          | 0,019 |
|                          | Equal variances not assumed |                    |       | 8,244                        | 217,670 | 0,000 | 0,015           | 0,002      | 0,012          | 0,019 |
| AAA_INVF                 | Equal variances assumed     | 1,414              | 0,236 | 6,717                        | 219,000 | 0,000 | 0,017           | 0,003      | 0,012          | 0,022 |
|                          | Equal variances not assumed |                    |       | 6,747                        | 218,844 | 0,000 | 0,017           | 0,003      | 0,012          | 0,022 |
| AB_INVF                  | Equal variances assumed     | 7,525              | 0,007 | 3,202                        | 218,000 | 0,002 | 0,027           | 0,008      | 0,010          | 0,044 |
|                          | Equal variances not assumed |                    |       | 3,185                        | 208,972 | 0,002 | 0,027           | 0,008      | 0,010          | 0,044 |
| Ba_INVF                  | Equal variances assumed     | 2,217              | 0,138 | 6,325                        | 219,000 | 0,000 | 0,013           | 0,002      | 0,009          | 0,016 |
|                          | Equal variances not assumed |                    |       | 6,369                        | 217,299 | 0,000 | 0,013           | 0,002      | 0,009          | 0,016 |
| Ce_INVF                  | Equal variances assumed     | 3,142              | 0,078 | 5,051                        | 219,000 | 0,000 | 0,036           | 0,007      | 0,022          | 0,049 |
|                          | Equal variances not assumed |                    |       | 5,001                        | 198,141 | 0,000 | 0,036           | 0,007      | 0,022          | 0,050 |
| Co_INVF                  | Equal variances assumed     | 0,651              | 0,421 | 3,437                        | 219,000 | 0,001 | 0,017           | 0,005      | 0,007          | 0,027 |
|                          | Equal variances not assumed |                    |       | 3,461                        | 217,111 | 0,001 | 0,017           | 0,005      | 0,007          | 0,027 |
| CAT_INVF                 | Equal variances assumed     | 0,007              | 0,933 | 2,056                        | 211,000 | 0,041 | 0,025           | 0,012      | 0,001          | 0,048 |
|                          | Equal variances not assumed |                    |       | 2,065                        | 210,962 | 0,040 | 0,025           | 0,012      | 0,001          | 0,048 |
| La_INVF                  | Equal variances assumed     | 2,132              | 0,146 | 7,863                        | 219,000 | 0,000 | 0,018           | 0,002      | 0,013          | 0,022 |
|                          | Equal variances not assumed |                    |       | 7,821                        | 209,742 | 0,000 | 0,018           | 0,002      | 0,013          | 0,022 |
| PL_INVF                  | Equal variances assumed     | 2,071              | 0,152 | 0,616                        | 218,000 | 0,538 | 0,005           | 0,009      | -0,012         | 0,023 |
|                          | Equal variances not assumed |                    |       | 0,619                        | 217,174 | 0,536 | 0,005           | 0,009      | -0,012         | 0,023 |

F = F-value, p = p-value, t = t-value, df = degrees of freedom, SE = standard error

| Group Statistics |        |         |       |       |            |
|------------------|--------|---------|-------|-------|------------|
| Sex              |        | N       | Mean  | SD    | SE of Mean |
| AMYG_ODI         | male   | 115,000 | 0,436 | 0,024 | 0,002      |
|                  | female | 106,000 | 0,433 | 0,024 | 0,002      |
| AAA_ODI          | male   | 115,000 | 0,443 | 0,029 | 0,003      |
|                  | female | 106,000 | 0,445 | 0,033 | 0,003      |
| AB_ODI           | male   | 115,000 | 0,398 | 0,102 | 0,010      |
|                  | female | 105,000 | 0,381 | 0,125 | 0,012      |
| Ba_ODI           | male   | 115,000 | 0,491 | 0,032 | 0,003      |
|                  | female | 106,000 | 0,491 | 0,031 | 0,003      |
| Ce_ODI           | male   | 115,000 | 0,325 | 0,052 | 0,005      |
|                  | female | 106,000 | 0,313 | 0,080 | 0,008      |
| Co_ODI           | male   | 115,000 | 0,395 | 0,036 | 0,003      |
|                  | female | 106,000 | 0,388 | 0,034 | 0,003      |
| CAT_ODI          | male   | 112,000 | 0,155 | 0,055 | 0,005      |
|                  | female | 101,000 | 0,155 | 0,062 | 0,006      |
| La_ODI           | male   | 115,000 | 0,443 | 0,045 | 0,004      |
|                  | female | 106,000 | 0,441 | 0,039 | 0,004      |
| PL_ODI           | male   | 114,000 | 0,453 | 0,127 | 0,012      |
|                  | female | 106,000 | 0,456 | 0,111 | 0,011      |

N = sample size, SD = standard deviation, SE = standard error

| Independent Samples Test |                             |                    |       |                              |         |       |                 |            |                |       |
|--------------------------|-----------------------------|--------------------|-------|------------------------------|---------|-------|-----------------|------------|----------------|-------|
|                          |                             | Levene's Tests for |       | t-test for Equality of Means |         |       |                 |            |                |       |
|                          |                             | F                  | p     | t                            | df      | p     | Mean Difference | SE of Mean | 95% Confidence |       |
|                          |                             |                    |       |                              |         |       |                 |            | Lower          | Upper |
| AMYG_ODI                 | Equal variances assumed     | 0,053              | 0,818 | 0,981                        | 219,000 | 0,328 | 0,003           | 0,003      | -0,003         | 0,010 |
|                          | Equal variances not assumed |                    |       | 0,981                        | 217,971 | 0,328 | 0,003           | 0,003      | -0,003         | 0,010 |
| AAA_ODI                  | Equal variances assumed     | 4,613              | 0,033 | -0,509                       | 219,000 | 0,611 | -0,002          | 0,004      | -0,010         | 0,006 |
|                          | Equal variances not assumed |                    |       | -0,506                       | 208,870 | 0,613 | -0,002          | 0,004      | -0,010         | 0,006 |
| AB_ODI                   | Equal variances assumed     | 5,760              | 0,017 | 1,138                        | 218,000 | 0,256 | 0,018           | 0,015      | -0,013         | 0,048 |
|                          | Equal variances not assumed |                    |       | 1,128                        | 201,057 | 0,261 | 0,018           | 0,016      | -0,013         | 0,048 |
| Ba_ODI                   | Equal variances assumed     | 0,067              | 0,797 | 0,153                        | 219,000 | 0,879 | 0,001           | 0,004      | -0,008         | 0,009 |
|                          | Equal variances not assumed |                    |       | 0,153                        | 218,741 | 0,878 | 0,001           | 0,004      | -0,008         | 0,009 |
| Ce_ODI                   | Equal variances assumed     | 8,697              | 0,004 | 1,245                        | 219,000 | 0,215 | 0,011           | 0,009      | -0,007         | 0,029 |
|                          | Equal variances not assumed |                    |       | 1,224                        | 176,975 | 0,223 | 0,011           | 0,009      | -0,007         | 0,029 |
| Co_ODI                   | Equal variances assumed     | 0,012              | 0,914 | 1,495                        | 219,000 | 0,136 | 0,007           | 0,005      | -0,002         | 0,016 |
|                          | Equal variances not assumed |                    |       | 1,498                        | 218,861 | 0,136 | 0,007           | 0,005      | -0,002         | 0,016 |
| CAT_ODI                  | Equal variances assumed     | 1,003              | 0,318 | 0,012                        | 211,000 | 0,990 | 0,000           | 0,008      | -0,016         | 0,016 |
|                          | Equal variances not assumed |                    |       | 0,012                        | 201,482 | 0,990 | 0,000           | 0,008      | -0,016         | 0,016 |
| La_ODI                   | Equal variances assumed     | 1,754              | 0,187 | 0,445                        | 219,000 | 0,657 | 0,003           | 0,006      | -0,009         | 0,014 |
|                          | Equal variances not assumed |                    |       | 0,447                        | 218,099 | 0,655 | 0,003           | 0,006      | -0,009         | 0,014 |
| PL_ODI                   | Equal variances assumed     | 2,501              | 0,115 | -0,171                       | 218,000 | 0,864 | -0,003          | 0,016      | -0,034         | 0,029 |
|                          | Equal variances not assumed |                    |       | -0,172                       | 217,180 | 0,864 | -0,003          | 0,016      | -0,034         | 0,029 |

F = F-value, p = p-value, t = t-value, df = degrees of freedom, SE = standard error

| Group Statistics |        |         |       |       |            |
|------------------|--------|---------|-------|-------|------------|
| Sex              |        | N       | Mean  | SD    | SE of Mean |
| AMYG_ISO         | male   | 115,000 | 0,383 | 0,055 | 0,005      |
|                  | female | 106,000 | 0,382 | 0,054 | 0,005      |
| AAA_ISO          | male   | 115,000 | 0,363 | 0,095 | 0,009      |
|                  | female | 106,000 | 0,375 | 0,090 | 0,009      |
| AB_ISO           | male   | 46,000  | 0,147 | 0,118 | 0,017      |
|                  | female | 41,000  | 0,131 | 0,105 | 0,016      |
| Ba_ISO           | male   | 115,000 | 0,359 | 0,096 | 0,009      |
|                  | female | 106,000 | 0,384 | 0,089 | 0,009      |
| Ce_ISO           | male   | 94,000  | 0,211 | 0,161 | 0,017      |
|                  | female | 79,000  | 0,214 | 0,145 | 0,016      |
| Co_ISO           | male   | 115,000 | 0,338 | 0,105 | 0,010      |
|                  | female | 106,000 | 0,348 | 0,079 | 0,008      |
| CAT_ISO          | male   | 77,000  | 0,160 | 0,143 | 0,016      |
|                  | female | 47,000  | 0,145 | 0,118 | 0,017      |
| La_ISO           | male   | 115,000 | 0,391 | 0,092 | 0,009      |
|                  | female | 106,000 | 0,372 | 0,084 | 0,008      |
| PL_ISO           | male   | 31,000  | 0,079 | 0,071 | 0,013      |
|                  | female | 20,000  | 0,096 | 0,086 | 0,019      |

N = sample size, SD = standard deviation, SE = standard error

| Independent Samples Test |                             |                    |       |                              |         |       |                 |            |                |       |
|--------------------------|-----------------------------|--------------------|-------|------------------------------|---------|-------|-----------------|------------|----------------|-------|
|                          |                             | Levene's Tests for |       | t-test for Equality of Means |         |       |                 |            |                |       |
|                          |                             | F                  | p     | t                            | df      | p     | Mean Difference | SE of Mean | 95% Confidence |       |
|                          |                             |                    |       |                              |         |       |                 |            | Lower          | Upper |
| AMYG_ODI                 | Equal variances assumed     | 0,059              | 0,809 | 0,107                        | 219,000 | 0,915 | 0,001           | 0,007      | -0,014         | 0,015 |
|                          | Equal variances not assumed |                    |       | 0,107                        | 217,994 | 0,915 | 0,001           | 0,007      | -0,014         | 0,015 |
| AAA_ODI                  | Equal variances assumed     | 0,306              | 0,580 | -0,942                       | 219,000 | 0,347 | -0,012          | 0,013      | -0,036         | 0,013 |
|                          | Equal variances not assumed |                    |       | -0,944                       | 218,863 | 0,346 | -0,012          | 0,012      | -0,036         | 0,013 |
| AB_ODI                   | Equal variances assumed     | 0,724              | 0,397 | 0,691                        | 85,000  | 0,492 | 0,017           | 0,024      | -0,031         | 0,065 |
|                          | Equal variances not assumed |                    |       | 0,695                        | 85,000  | 0,489 | 0,017           | 0,024      | -0,031         | 0,064 |
| Ba_ODI                   | Equal variances assumed     | 1,199              | 0,275 | -1,951                       | 219,000 | 0,052 | -0,024          | 0,012      | -0,049         | 0,000 |
|                          | Equal variances not assumed |                    |       | -1,957                       | 218,995 | 0,052 | -0,024          | 0,012      | -0,049         | 0,000 |
| Ce_ODI                   | Equal variances assumed     | 1,618              | 0,205 | -0,122                       | 171,000 | 0,903 | -0,003          | 0,023      | -0,049         | 0,043 |
|                          | Equal variances not assumed |                    |       | -0,123                       | 170,052 | 0,902 | -0,003          | 0,023      | -0,049         | 0,043 |
| Co_ODI                   | Equal variances assumed     | 4,622              | 0,033 | -0,804                       | 219,000 | 0,422 | -0,010          | 0,013      | -0,035         | 0,015 |
|                          | Equal variances not assumed |                    |       | -0,813                       | 210,960 | 0,417 | -0,010          | 0,012      | -0,035         | 0,014 |
| CAT_ODI                  | Equal variances assumed     | 0,522              | 0,471 | 0,610                        | 122,000 | 0,543 | 0,015           | 0,025      | -0,034         | 0,064 |
|                          | Equal variances not assumed |                    |       | 0,639                        | 111,232 | 0,524 | 0,015           | 0,024      | -0,032         | 0,062 |
| La_ODI                   | Equal variances assumed     | 1,013              | 0,315 | 1,533                        | 219,000 | 0,127 | 0,018           | 0,012      | -0,005         | 0,042 |
|                          | Equal variances not assumed |                    |       | 1,539                        | 218,963 | 0,125 | 0,018           | 0,012      | -0,005         | 0,042 |
| PL_ODI                   | Equal variances assumed     | 1,619              | 0,209 | -0,775                       | 49,000  | 0,442 | -0,017          | 0,022      | -0,062         | 0,027 |
|                          | Equal variances not assumed |                    |       | -0,742                       | 34,972  | 0,463 | -0,017          | 0,023      | -0,064         | 0,030 |

F = F-value, p = p-value, t = t-value, df = degrees of freedom, SE = standard error

| Model Summary                                                                                         |                    |          |                   |                    |       |
|-------------------------------------------------------------------------------------------------------|--------------------|----------|-------------------|--------------------|-------|
| Model                                                                                                 | R                  | R Square | Adjusted R Square | SE of the Estimate | $f^2$ |
| 1                                                                                                     | 0,319 <sup>a</sup> | 0,102    | 0,059             | 22,176             | 0,114 |
| a. Predictors: (Constant), Sex, Age, AAA_GMV, AB_GMV, Ba_GMV, Ce_GMV, Co_GMV, CAT_GMV, La_GMV, PL_GMV |                    |          |                   |                    |       |
| R = R value; SE = standard error; $f^2$ = Cohen's $f^2$                                               |                    |          |                   |                    |       |

| a. Dependent Variable: NEO_NEU                                                                        |            |                |         |             |       |                   |
|-------------------------------------------------------------------------------------------------------|------------|----------------|---------|-------------|-------|-------------------|
| Model                                                                                                 |            | Sum of Squares | df      | Mean Square | F     | p                 |
| 1                                                                                                     | Regression | 11715,160      | 10,000  | 1171,516    | 2,382 | ,011 <sup>b</sup> |
|                                                                                                       | Residual   | 103273,610     | 210,000 | 491,779     |       |                   |
|                                                                                                       | Total      | 114988,769     | 220,000 |             |       |                   |
| a. Dependent Variable: Neuroticism                                                                    |            |                |         |             |       |                   |
| b. Predictors: (Constant), Sex, Age, AAA_GMV, AB_GMV, Ba_GMV, Ce_GMV, Co_GMV, CAT_GMV, La_GMV, PL_GMV |            |                |         |             |       |                   |
| df = degrees of freedom; F = F value; p = p value                                                     |            |                |         |             |       |                   |

| Coefficients <sup>a</sup>                                                                           |            |                             |        |                           |        |       |
|-----------------------------------------------------------------------------------------------------|------------|-----------------------------|--------|---------------------------|--------|-------|
| Model                                                                                               |            | Unstandardized Coefficients |        | Standardized Coefficients | t      | p     |
|                                                                                                     |            | B                           | SE     | $\beta$                   |        |       |
| 1                                                                                                   | (Constant) | 69,730                      | 22,904 |                           | 3,044  | 0,003 |
|                                                                                                     | Sex        | 14,574                      | 3,600  | 0,319                     | 4,048  | 0,000 |
|                                                                                                     | Age        | -0,693                      | 0,449  | -0,104                    | -1,545 | 0,124 |
|                                                                                                     | AAA_GMV    | -0,084                      | 0,144  | -0,224                    | -0,583 | 0,560 |
|                                                                                                     | AB_GMV     | 0,041                       | 0,186  | 0,026                     | 0,222  | 0,825 |
|                                                                                                     | Ba_GMV     | -0,052                      | 0,110  | -0,212                    | -0,468 | 0,640 |
|                                                                                                     | Ce_GMV     | 0,072                       | 0,172  | 0,044                     | 0,419  | 0,676 |
|                                                                                                     | Co_GMV     | 0,264                       | 0,448  | 0,092                     | 0,589  | 0,557 |
|                                                                                                     | CAT_GMV    | 0,081                       | 0,098  | 0,150                     | 0,826  | 0,409 |
|                                                                                                     | La_GMV     | 0,020                       | 0,028  | 0,112                     | 0,714  | 0,476 |
|                                                                                                     | PL_GMV     | 0,319                       | 0,479  | 0,156                     | 0,666  | 0,506 |
| a. Dependent Variable: Neuroticism                                                                  |            |                             |        |                           |        |       |
| B = unstandardized beta; SE = standard error; $\beta$ = standardized beta; t = t value; p = p value |            |                             |        |                           |        |       |

| Model Summary                                                                                                 |                    |                |                         |                    |                       |
|---------------------------------------------------------------------------------------------------------------|--------------------|----------------|-------------------------|--------------------|-----------------------|
| Model                                                                                                         | R                  | R <sup>2</sup> | Adjusted R <sup>2</sup> | SE of the Estimate | <i>f</i> <sup>2</sup> |
| 1                                                                                                             | 0,382 <sup>a</sup> | 0,146          | 0,104                   | 21,646             | 0,171                 |
| a. Predictors: (Constant), Sex, Age, AAA_INVF, AB_INVF, Ba_INVF, Ce_INVF, Co_INVF, CAT_INVF, La_INVF, PL_INVF |                    |                |                         |                    |                       |
| R = R value; SE = standard error; <i>f</i> <sup>2</sup> = Cohen's <i>f</i> <sup>2</sup>                       |                    |                |                         |                    |                       |

| ANOVA <sup>a</sup>                                                                                            |            |                |         |             |       |                    |
|---------------------------------------------------------------------------------------------------------------|------------|----------------|---------|-------------|-------|--------------------|
| Model                                                                                                         |            | Sum of Squares | df      | Mean Square | F     | p                  |
| 1                                                                                                             | Regression | 16106,810      | 10,000  | 1610,681    | 3,438 | 0,000 <sup>b</sup> |
|                                                                                                               | Residual   | 94177,873      | 201,000 | 468,547     |       |                    |
|                                                                                                               | Total      | 110284,683     | 211,000 |             |       |                    |
| a. Dependent Variable: Neuroticism                                                                            |            |                |         |             |       |                    |
| b. Predictors: (Constant), Sex, Age, AAA_INVF, AB_INVF, Ba_INVF, Ce_INVF, Co_INVF, CAT_INVF, La_INVF, PL_INVF |            |                |         |             |       |                    |
| df = degrees of freedom; F = F value; p = p value                                                             |            |                |         |             |       |                    |

| Coefficients <sup>a</sup>                                                                     |            |                             |         |                           |        |       |
|-----------------------------------------------------------------------------------------------|------------|-----------------------------|---------|---------------------------|--------|-------|
| Model                                                                                         |            | Unstandardized Coefficients |         | Standardized Coefficients | t      | p     |
|                                                                                               |            | B                           | SE      | β                         |        |       |
| 1                                                                                             | (Constant) | 184,333                     | 37,661  |                           | 4,895  | 0,000 |
|                                                                                               | Sex        | 6,979                       | 3,581   | 0,153                     | 1,949  | 0,053 |
|                                                                                               | Age        | -0,237                      | 0,471   | -0,035                    | -0,503 | 0,616 |
|                                                                                               | AAA_INVF   | -33,236                     | 117,258 | -0,030                    | -0,283 | 0,777 |
|                                                                                               | AB_INVF    | 15,240                      | 24,475  | 0,043                     | 0,623  | 0,534 |
|                                                                                               | Ba_INVF    | 68,236                      | 150,957 | 0,048                     | 0,452  | 0,652 |
|                                                                                               | Ce_INVF    | -2,520                      | 30,482  | -0,006                    | -0,083 | 0,934 |
|                                                                                               | Co_INVF    | -74,233                     | 45,124  | -0,122                    | -1,645 | 0,102 |
|                                                                                               | CAT_INVF   | 11,732                      | 17,571  | 0,045                     | 0,668  | 0,505 |
|                                                                                               | La_INVF    | -294,052                    | 110,197 | -0,243                    | -2,668 | 0,008 |
|                                                                                               | PL_INVF    | 22,759                      | 23,817  | 0,064                     | 0,956  | 0,340 |
| a. Dependent Variable: Neuroticism;                                                           |            |                             |         |                           |        |       |
| B = unstandardized beta; SE = standard error; β = standardized beta; t = t value; p = p value |            |                             |         |                           |        |       |

| Model Summary                                                                                         |                    |          |                   |                    |       |
|-------------------------------------------------------------------------------------------------------|--------------------|----------|-------------------|--------------------|-------|
| Model                                                                                                 | R                  | R Square | Adjusted R Square | SE of the Estimate | $f^2$ |
| 1                                                                                                     | 0,372 <sup>a</sup> | 0,138    | 0,095             | 21,747             | 0,160 |
| a. Predictors: (Constant), Sex, Age, AAA_ODI, AB_ODI, Ba_ODI, Ce_ODI, Co_ODI, CAT_ODI, La_ODI, PL_ODI |                    |          |                   |                    |       |
| R = R value; SE = standard error; $f^2$ = Cohen's $f^2$                                               |                    |          |                   |                    |       |

| ANOVA <sup>a</sup>                                                                                    |            |                |         |             |       |                    |
|-------------------------------------------------------------------------------------------------------|------------|----------------|---------|-------------|-------|--------------------|
| Model                                                                                                 |            | Sum of Squares | df      | Mean Square | F     | p                  |
| 1                                                                                                     | Regression | 15226,300      | 10,000  | 1522,630    | 3,220 | 0,001 <sup>b</sup> |
|                                                                                                       | Residual   | 95058,383      | 201,000 | 472,927     |       |                    |
|                                                                                                       | Total      | 110284,683     | 211,000 |             |       |                    |
| a. Dependent Variable: Neuroticism                                                                    |            |                |         |             |       |                    |
| b. Predictors: (Constant), Sex, Age, AAA_ODI, AB_ODI, Ba_ODI, Ce_ODI, Co_ODI, CAT_ODI, La_ODI, PL_ODI |            |                |         |             |       |                    |
| df = degrees of freedom; F = F value; p = p value                                                     |            |                |         |             |       |                    |

| Coefficients <sup>a</sup>                                                                           |            |                             |        |                           |        |       |
|-----------------------------------------------------------------------------------------------------|------------|-----------------------------|--------|---------------------------|--------|-------|
| Model                                                                                               |            | Unstandardized Coefficients |        | Standardized Coefficients | t      | p     |
|                                                                                                     |            | B                           | SE     | $\beta$                   |        |       |
| 1                                                                                                   | (Constant) | 116,143                     | 31,838 |                           | 3,648  | 0,000 |
|                                                                                                     | Sex        | 11,602                      | 3,069  | 0,254                     | 3,780  | 0,000 |
|                                                                                                     | Age        | -0,672                      | 0,450  | -0,101                    | -1,492 | 0,137 |
|                                                                                                     | AAA_ODI    | -32,228                     | 64,119 | -0,044                    | -0,503 | 0,616 |
|                                                                                                     | AB_ODI     | 10,800                      | 14,441 | 0,054                     | 0,748  | 0,455 |
|                                                                                                     | Ba_ODI     | 89,324                      | 63,827 | 0,122                     | 1,399  | 0,163 |
|                                                                                                     | Ce_ODI     | -4,745                      | 24,159 | -0,014                    | -0,196 | 0,844 |
|                                                                                                     | Co_ODI     | -69,603                     | 53,185 | -0,106                    | -1,309 | 0,192 |
|                                                                                                     | CAT_ODI    | 48,107                      | 26,459 | 0,122                     | 1,818  | 0,071 |
|                                                                                                     | La_ODI     | -100,335                    | 44,004 | -0,184                    | -2,280 | 0,024 |
|                                                                                                     | PL_ODI     | 21,681                      | 12,939 | 0,113                     | 1,676  | 0,095 |
| a. Dependent Variable: Neuroticism                                                                  |            |                             |        |                           |        |       |
| B = unstandardized beta; SE = standard error; $\beta$ = standardized beta; t = t value; p = p value |            |                             |        |                           |        |       |

| Model Summary                                                                                         |                    |          |                   |                    |       |
|-------------------------------------------------------------------------------------------------------|--------------------|----------|-------------------|--------------------|-------|
| Model                                                                                                 | R                  | R Square | Adjusted R Square | SE of the Estimate | $f^2$ |
| 1                                                                                                     | 0,378 <sup>a</sup> | 0,143    | -1,081            | 32,979             | 0,167 |
| a. Predictors: (Constant), Sex, Age, AAA_ISO, AB_ISO, Ba_ISO, Ce_ISO, Co_ISO, CAT_ISO, La_ISO, PL_ISO |                    |          |                   |                    |       |
| R = R value; SE = standard error; $f^2$ = Cohen's $f^2$                                               |                    |          |                   |                    |       |

| ANOVA <sup>a</sup>                                                                                    |            |                |        |             |       |                    |
|-------------------------------------------------------------------------------------------------------|------------|----------------|--------|-------------|-------|--------------------|
| Model                                                                                                 |            | Sum of Squares | df     | Mean Square | F     | p                  |
| 1                                                                                                     | Regression | 1272,039       | 10,000 | 127,204     | 0,117 | 0,998 <sup>b</sup> |
|                                                                                                       | Residual   | 7613,457       | 7,000  | 1087,637    |       |                    |
|                                                                                                       | Total      | 8885,496       | 17,000 |             |       |                    |
| a. Dependent Variable: Neuroticism                                                                    |            |                |        |             |       |                    |
| b. Predictors: (Constant), Sex, Age, AAA_ISO, AB_ISO, Ba_ISO, Ce_ISO, Co_ISO, CAT_ISO, La_ISO, PL_ISO |            |                |        |             |       |                    |
| df = degrees of freedom; F = F value; p = p value                                                     |            |                |        |             |       |                    |

| Coefficients <sup>a</sup>                                                                           |            |                             |         |                           |        |       |
|-----------------------------------------------------------------------------------------------------|------------|-----------------------------|---------|---------------------------|--------|-------|
| Model                                                                                               |            | Unstandardized Coefficients |         | Standardized Coefficients | t      | p     |
|                                                                                                     |            | B                           | SE      | $\beta$                   |        |       |
| 1                                                                                                   | (Constant) | 118,412                     | 81,312  |                           | 1,456  | 0,189 |
|                                                                                                     | Sex        | 12,710                      | 16,637  | 0,278                     | 0,764  | 0,470 |
|                                                                                                     | Age        | -0,462                      | 2,410   | -0,069                    | -0,192 | 0,853 |
|                                                                                                     | AAA_ISO    | 7,202                       | 102,486 | 0,029                     | 0,070  | 0,946 |
|                                                                                                     | AB_ISO     | -0,431                      | 84,429  | -0,002                    | -0,005 | 0,996 |
|                                                                                                     | Ba_ISO     | -24,416                     | 101,821 | -0,100                    | -0,240 | 0,817 |
|                                                                                                     | Ce_ISO     | -7,108                      | 60,211  | -0,048                    | -0,118 | 0,909 |
|                                                                                                     | Co_ISO     | -10,089                     | 95,006  | -0,041                    | -0,106 | 0,918 |
|                                                                                                     | CAT_ISO    | 9,200                       | 62,052  | 0,054                     | 0,148  | 0,886 |
|                                                                                                     | La_ISO     | -45,198                     | 94,764  | -0,175                    | -0,477 | 0,648 |
|                                                                                                     | PL_ISO     | -29,749                     | 121,712 | -0,100                    | -0,244 | 0,814 |
| a. Dependent Variable: Neuroticism                                                                  |            |                             |         |                           |        |       |
| B = unstandardized beta; SE = standard error; $\beta$ = standardized beta; t = t value; p = p value |            |                             |         |                           |        |       |

| Model Summary                                                                                         |                    |          |                   |                    |       |
|-------------------------------------------------------------------------------------------------------|--------------------|----------|-------------------|--------------------|-------|
| Model                                                                                                 | R                  | R Square | Adjusted R Square | SE of the Estimate | $f^2$ |
| 1,000                                                                                                 | 0,353 <sup>a</sup> | 0,124    | 0,083             | 5,366              | 0,142 |
| a. Predictors: (Constant), Sex, Age, AAA_GMV, AB_GMV, Ba_GMV, Ce_GMV, Co_GMV, CAT_GMV, La_GMV, PL_GMV |                    |          |                   |                    |       |
| R = R value; SE = standard error; $f^2$ = Cohen's $f^2$                                               |                    |          |                   |                    |       |

| ANOVA <sup>a</sup>                                                                                   |            |                |         |             |       |                    |
|------------------------------------------------------------------------------------------------------|------------|----------------|---------|-------------|-------|--------------------|
| Model                                                                                                |            | Sum of Squares | df      | Mean Square | F     | p                  |
| 1,000                                                                                                | Regression | 857,981        | 10,000  | 85,798      | 2,980 | 0,002 <sup>b</sup> |
|                                                                                                      | Residual   | 6046,553       | 210,000 | 28,793      |       |                    |
|                                                                                                      | Total      | 6904,534       | 220,000 |             |       |                    |
| a. Dependent Variable: Anxiety                                                                       |            |                |         |             |       |                    |
| b. Predictors: (Constant) Sex, Age, AAA_GMV, AB_GMV, Ba_GMV, Ce_GMV, Co_GMV, CAT_GMV, La_GMV, PL_GMV |            |                |         |             |       |                    |
| df = degrees of freedom; F = F value; p = p value                                                    |            |                |         |             |       |                    |

| Coefficients <sup>a</sup>                                                                           |            |                             |       |                           |        |       |
|-----------------------------------------------------------------------------------------------------|------------|-----------------------------|-------|---------------------------|--------|-------|
| Model                                                                                               |            | Unstandardized Coefficients |       | Standardized Coefficients | t      | p     |
|                                                                                                     |            | B                           | SE    | $\beta$                   |        |       |
| 1,000                                                                                               | (Constant) | 12,163                      | 5,542 |                           | 2,195  | 0,029 |
|                                                                                                     | Sex        | 3,782                       | 0,871 | 0,338                     | 4,342  | 0,000 |
|                                                                                                     | Age        | -0,190                      | 0,109 | -0,116                    | -1,746 | 0,082 |
|                                                                                                     | AAA_GMV    | 0,002                       | 0,035 | 0,025                     | 0,066  | 0,948 |
|                                                                                                     | AB_GMV     | -0,051                      | 0,045 | -0,131                    | -1,136 | 0,257 |
|                                                                                                     | Ba_GMV     | -0,026                      | 0,027 | -0,443                    | -0,992 | 0,323 |
|                                                                                                     | Ce_GMV     | -0,009                      | 0,042 | -0,022                    | -0,212 | 0,832 |
|                                                                                                     | Co_GMV     | 0,042                       | 0,108 | 0,059                     | 0,385  | 0,701 |
|                                                                                                     | CAT_GMV    | 0,011                       | 0,024 | 0,086                     | 0,477  | 0,634 |
|                                                                                                     | La_GMV     | 0,011                       | 0,007 | 0,260                     | 1,678  | 0,095 |
|                                                                                                     | PL_GMV     | 0,136                       | 0,116 | 0,271                     | 1,176  | 0,241 |
| a. Dependent Variable: Anxiety                                                                      |            |                             |       |                           |        |       |
| B = unstandardized beta; SE = standard error; $\beta$ = standardized beta; t = t value; p = p value |            |                             |       |                           |        |       |

| Model Summary                                                                                                 |                    |          |                   |                    |       |
|---------------------------------------------------------------------------------------------------------------|--------------------|----------|-------------------|--------------------|-------|
| Model                                                                                                         | R                  | R Square | Adjusted R Square | SE of the Estimate | $f^2$ |
| 1                                                                                                             | 0,357 <sup>a</sup> | 0,127    | 0,084             | 5,362              | 0,145 |
| a. Predictors: (Constant), Sex, Age, AAA_INVF, AB_INVF, Ba_INVF, Ce_INVF, Co_INVF, CAT_INVF, La_INVF, PL_INVF |                    |          |                   |                    |       |
| R = R value; SE = standard error; $f^2$ = Cohen's $f^2$                                                       |                    |          |                   |                    |       |

| ANOVA <sup>a</sup>                                                                                            |            |                |         |             |       |                    |
|---------------------------------------------------------------------------------------------------------------|------------|----------------|---------|-------------|-------|--------------------|
| Model                                                                                                         |            | Sum of Squares | df      | Mean Square | F     | p                  |
| 1                                                                                                             | Regression | 842,098        | 10,000  | 84,210      | 2,928 | 0,002 <sup>b</sup> |
|                                                                                                               | Residual   | 5779,978       | 201,000 | 28,756      |       |                    |
|                                                                                                               | Total      | 6622,076       | 211,000 |             |       |                    |
| a. Dependent Variable: Anxiety                                                                                |            |                |         |             |       |                    |
| b. Predictors: (Constant), Sex, Age, AAA_INVF, AB_INVF, Ba_INVF, Ce_INVF, Co_INVF, CAT_INVF, La_INVF, PL_INVF |            |                |         |             |       |                    |
| df = degrees of freedom; F = F value; p = p value                                                             |            |                |         |             |       |                    |

| Coefficients <sup>a</sup>                                                                           |            |                             |        |                           |        |       |
|-----------------------------------------------------------------------------------------------------|------------|-----------------------------|--------|---------------------------|--------|-------|
| Model                                                                                               |            | Unstandardized Coefficients |        | Standardized Coefficients | t      | p     |
|                                                                                                     |            | B                           | SE     | $\beta$                   |        |       |
| 1                                                                                                   | (Constant) | 36,395                      | 9,330  |                           | 3,901  | 0,000 |
|                                                                                                     | Sex        | 2,021                       | 0,887  | 0,181                     | 2,278  | 0,024 |
|                                                                                                     | Age        | -0,076                      | 0,117  | -0,046                    | -0,653 | 0,515 |
|                                                                                                     | AAA_INVF   | 20,879                      | 29,049 | 0,077                     | 0,719  | 0,473 |
|                                                                                                     | AB_INVF    | 4,168                       | 6,063  | 0,048                     | 0,687  | 0,493 |
|                                                                                                     | Ba_INVF    | -15,631                     | 37,397 | -0,045                    | -0,418 | 0,676 |
|                                                                                                     | Ce_INVF    | -9,402                      | 7,552  | -0,093                    | -1,245 | 0,215 |
|                                                                                                     | Co_INVF    | -13,612                     | 11,179 | -0,091                    | -1,218 | 0,225 |
|                                                                                                     | CAT_INVF   | 2,989                       | 4,353  | 0,047                     | 0,687  | 0,493 |
|                                                                                                     | La_INVF    | -48,261                     | 27,300 | -0,162                    | -1,768 | 0,079 |
|                                                                                                     | PL_INVF    | -0,360                      | 5,900  | -0,004                    | -0,061 | 0,951 |
| a. Dependent Variable: Anxiety                                                                      |            |                             |        |                           |        |       |
| B = unstandardized beta; SE = standard error; $\beta$ = standardized beta; t = t value; p = p value |            |                             |        |                           |        |       |

| Model Summary                                                                                         |                    |          |                   |                    |       |
|-------------------------------------------------------------------------------------------------------|--------------------|----------|-------------------|--------------------|-------|
| Model                                                                                                 | R                  | R Square | Adjusted R Square | SE of the Estimate | $f^2$ |
| 1                                                                                                     | 0,338 <sup>a</sup> | 0,114    | 0,070             | 5,401              | 0,129 |
| a. Predictors: (Constant), Sex, Age, AAA_ODI, AB_ODI, Ba_ODI, Ce_ODI, Co_ODI, CAT_ODI, La_ODI, PL_ODI |                    |          |                   |                    |       |
| R = R value; SE = standard error; $f^2$ = Cohen's $f^2$                                               |                    |          |                   |                    |       |

| ANOVA <sup>a</sup>                                                                                    |            |                |         |             |       |                    |
|-------------------------------------------------------------------------------------------------------|------------|----------------|---------|-------------|-------|--------------------|
| Model                                                                                                 |            | Sum of Squares | df      | Mean Square | F     | p                  |
| 1                                                                                                     | Regression | 757,827        | 10,000  | 75,783      | 2,597 | 0,006 <sup>b</sup> |
|                                                                                                       | Residual   | 5864,249       | 201,000 | 29,175      |       |                    |
|                                                                                                       | Total      | 6622,076       | 211,000 |             |       |                    |
| a. Dependent Variable: Anxiety                                                                        |            |                |         |             |       |                    |
| b. Predictors: (Constant), Sex, Age, AAA_ODI, AB_ODI, Ba_ODI, Ce_ODI, Co_ODI, CAT_ODI, La_ODI, PL_ODI |            |                |         |             |       |                    |
| df = degrees of freedom; F = F value; p = p value                                                     |            |                |         |             |       |                    |

| Coefficients <sup>a</sup>                                                                           |            |                             |        |                           |        |       |
|-----------------------------------------------------------------------------------------------------|------------|-----------------------------|--------|---------------------------|--------|-------|
| Model                                                                                               |            | Unstandardized Coefficients |        | Standardized Coefficients | t      | p     |
|                                                                                                     |            | B                           | SE     | $\beta$                   |        |       |
| 1                                                                                                   | (Constant) | 24,175                      | 7,908  |                           | 3,057  | 0,003 |
|                                                                                                     | Sex        | 2,925                       | 0,762  | 0,261                     | 3,837  | 0,000 |
|                                                                                                     | Age        | -0,151                      | 0,112  | -0,092                    | -1,347 | 0,179 |
|                                                                                                     | AAA_ODI    | -6,220                      | 15,926 | -0,035                    | -0,391 | 0,697 |
|                                                                                                     | AB_ODI     | 2,984                       | 3,587  | 0,061                     | 0,832  | 0,406 |
|                                                                                                     | Ba_ODI     | 18,542                      | 15,853 | 0,103                     | 1,170  | 0,244 |
|                                                                                                     | Ce_ODI     | -3,689                      | 6,000  | -0,044                    | -0,615 | 0,539 |
|                                                                                                     | Co_ODI     | -15,196                     | 13,210 | -0,094                    | -1,150 | 0,251 |
|                                                                                                     | CAT_ODI    | 7,314                       | 6,572  | 0,076                     | 1,113  | 0,267 |
|                                                                                                     | La_ODI     | -19,698                     | 10,929 | -0,148                    | -1,802 | 0,073 |
|                                                                                                     | PL_ODI     | 0,534                       | 3,214  | 0,011                     | 0,166  | 0,868 |
| a. Dependent Variable: Anxiety                                                                      |            |                             |        |                           |        |       |
| B = unstandardized beta; SE = standard error; $\beta$ = standardized beta; t = t value; p = p value |            |                             |        |                           |        |       |

| Model Summary                                                                                         |                    |          |                   |                    |       |
|-------------------------------------------------------------------------------------------------------|--------------------|----------|-------------------|--------------------|-------|
| Model                                                                                                 | R                  | R Square | Adjusted R Square | SE of the Estimate | $f^2$ |
| 1                                                                                                     | 0,392 <sup>a</sup> | 0,154    | -1,055            | 8,032              | 0,182 |
| a. Predictors: (Constant), Sex, Age, AAA_ISO, AB_ISO, Ba_ISO, Ce_ISO, Co_ISO, CAT_ISO, La_ISO, PL_ISO |                    |          |                   |                    |       |
| R = R value; SE = standard error; $f^2$ = Cohen's $f^2$                                               |                    |          |                   |                    |       |

| ANOVA <sup>a</sup>                                                                                    |            |                |        |             |       |                    |
|-------------------------------------------------------------------------------------------------------|------------|----------------|--------|-------------|-------|--------------------|
| Model                                                                                                 |            | Sum of Squares | df     | Mean Square | F     | p                  |
| 1                                                                                                     | Regression | 81,965         | 10,000 | 8,197       | 0,127 | 0,998 <sup>b</sup> |
|                                                                                                       | Residual   | 451,567        | 7,000  | 64,510      |       |                    |
|                                                                                                       | Total      | 533,532        | 17,000 |             |       |                    |
| a. Dependent Variable: Anxiety                                                                        |            |                |        |             |       |                    |
| b. Predictors: (Constant), Sex, Age, AAA_ISO, AB_ISO, Ba_ISO, Ce_ISO, Co_ISO, CAT_ISO, La_ISO, PL_ISO |            |                |        |             |       |                    |
| df = degrees of freedom; F = F value; p = p value                                                     |            |                |        |             |       |                    |

| Coefficients <sup>a</sup>                                                                           |            |                             |        |                           |        |       |
|-----------------------------------------------------------------------------------------------------|------------|-----------------------------|--------|---------------------------|--------|-------|
| Model                                                                                               |            | Unstandardized Coefficients |        | Standardized Coefficients | t      | p     |
|                                                                                                     |            | B                           | SE     | $\beta$                   |        |       |
| 1                                                                                                   | (Constant) | 23,538                      | 19,803 |                           | 1,189  | 0,273 |
|                                                                                                     | Sex        | 3,260                       | 4,052  | 0,291                     | 0,805  | 0,447 |
|                                                                                                     | Age        | -0,107                      | 0,587  | -0,065                    | -0,182 | 0,861 |
|                                                                                                     | AAA_ISO    | 3,823                       | 24,959 | 0,063                     | 0,153  | 0,883 |
|                                                                                                     | AB_ISO     | -1,938                      | 20,562 | -0,039                    | -0,094 | 0,928 |
|                                                                                                     | Ba_ISO     | -11,759                     | 24,797 | -0,196                    | -0,474 | 0,650 |
|                                                                                                     | Ce_ISO     | -2,662                      | 14,664 | -0,073                    | -0,182 | 0,861 |
|                                                                                                     | Co_ISO     | -0,867                      | 23,138 | -0,014                    | -0,037 | 0,971 |
|                                                                                                     | CAT_ISO    | 1,603                       | 15,112 | 0,038                     | 0,106  | 0,919 |
|                                                                                                     | La_ISO     | -8,422                      | 23,079 | -0,133                    | -0,365 | 0,726 |
| PL_ISO                                                                                              | -5,397     | 29,642                      | -0,074 | -0,182                    | 0,861  |       |
| a. Dependent Variable: Anxiety                                                                      |            |                             |        |                           |        |       |
| B = unstandardized beta; SE = standard error; $\beta$ = standardized beta; t = t value; p = p value |            |                             |        |                           |        |       |

| Model Summary                                                                                         |                    |          |                   |                    |       |
|-------------------------------------------------------------------------------------------------------|--------------------|----------|-------------------|--------------------|-------|
| Model                                                                                                 | R                  | R Square | Adjusted R Square | SE of the Estimate | $f^2$ |
| 1                                                                                                     | 0,302 <sup>a</sup> | 0,091    | 0,048             | 4,793              | 0,100 |
| a. Predictors: (Constant), Sex, Age, AAA_GMV, AB_GMV, Ba_GMV, Ce_GMV, Co_GMV, CAT_GMV, La_GMV, PL_GMV |                    |          |                   |                    |       |
| R = R value; SE = standard error; $f^2$ = Cohen's $f^2$                                               |                    |          |                   |                    |       |

| ANOVA <sup>a</sup>                                                                                    |            |                |         |             |       |                    |
|-------------------------------------------------------------------------------------------------------|------------|----------------|---------|-------------|-------|--------------------|
| Model                                                                                                 |            | Sum of Squares | df      | Mean Square | F     | p                  |
| 1                                                                                                     | Regression | 483,783        | 10,000  | 48,378      | 2,106 | 0,025 <sup>b</sup> |
|                                                                                                       | Residual   | 4823,330       | 210,000 | 22,968      |       |                    |
|                                                                                                       | Total      | 5307,113       | 220,000 |             |       |                    |
| a. Dependent Variable: Angry hostility                                                                |            |                |         |             |       |                    |
| b. Predictors: (Constant), Sex, Age, AAA_GMV, AB_GMV, Ba_GMV, Ce_GMV, Co_GMV, CAT_GMV, La_GMV, PL_GMV |            |                |         |             |       |                    |
| df = degrees of freedom; F = F value; p = p value                                                     |            |                |         |             |       |                    |

| Coefficients <sup>a</sup>                                                                           |            |                             |        |                           |        |       |
|-----------------------------------------------------------------------------------------------------|------------|-----------------------------|--------|---------------------------|--------|-------|
| Model                                                                                               |            | Unstandardized Coefficients |        | Standardized Coefficients | t      | p     |
|                                                                                                     |            | B                           | SE     | $\beta$                   |        |       |
| 1                                                                                                   | (Constant) | 13,231                      | 4,950  |                           | 2,673  | 0,008 |
|                                                                                                     | Sex        | 2,408                       | 0,778  | 0,245                     | 3,095  | 0,002 |
|                                                                                                     | Age        | -0,160                      | 0,097  | -0,112                    | -1,652 | 0,100 |
|                                                                                                     | AAA_GMV    | -0,048                      | 0,031  | -0,591                    | -1,532 | 0,127 |
|                                                                                                     | AB_GMV     | 0,005                       | 0,040  | 0,016                     | 0,136  | 0,892 |
|                                                                                                     | Ba_GMV     | 0,007                       | 0,024  | 0,136                     | 0,299  | 0,765 |
|                                                                                                     | Ce_GMV     | 0,037                       | 0,037  | 0,105                     | 1,006  | 0,316 |
|                                                                                                     | Co_GMV     | 0,075                       | 0,097  | 0,122                     | 0,777  | 0,438 |
|                                                                                                     | CAT_GMV    | 0,040                       | 0,021  | 0,343                     | 1,876  | 0,062 |
|                                                                                                     | La_GMV     | 0,006                       | 0,006  | 0,151                     | 0,957  | 0,340 |
| PL_GMV                                                                                              | -0,091     | 0,103                       | -0,208 | -0,884                    | 0,378  |       |
| a. Dependent Variable: Angry hostility                                                              |            |                             |        |                           |        |       |
| B = unstandardized beta; SE = standard error; $\beta$ = standardized beta; t = t value; p = p value |            |                             |        |                           |        |       |

| Model Summary                                                                                                 |                    |          |                   |                    |       |
|---------------------------------------------------------------------------------------------------------------|--------------------|----------|-------------------|--------------------|-------|
| Model                                                                                                         | R                  | R Square | Adjusted R Square | SE of the Estimate | $f^2$ |
| 1                                                                                                             | 0,331 <sup>a</sup> | 0,110    | 0,065             | 4,749              | 0,124 |
| a. Predictors: (Constant), Sex, Age, AAA_INVF, AB_INVF, Ba_INVF, Ce_INVF, Co_INVF, CAT_INVF, La_INVF, PL_INVF |                    |          |                   |                    |       |
| R = R value; SE = standard error; $f^2$ = Cohen's $f^2$                                                       |                    |          |                   |                    |       |

| ANOVA <sup>a</sup>                                                                                            |            |                |         |             |       |                    |
|---------------------------------------------------------------------------------------------------------------|------------|----------------|---------|-------------|-------|--------------------|
| Model                                                                                                         |            | Sum of Squares | df      | Mean Square | F     | p                  |
| 1                                                                                                             | Regression | 557,778        | 10,000  | 55,778      | 2,474 | 0,008 <sup>b</sup> |
|                                                                                                               | Residual   | 4532,226       | 201,000 | 22,548      |       |                    |
|                                                                                                               | Total      | 5090,004       | 211,000 |             |       |                    |
| a. Dependent Variable: Angry hostility                                                                        |            |                |         |             |       |                    |
| b. Predictors: (Constant), Sex, Age, AAA_INVF, AB_INVF, Ba_INVF, Ce_INVF, Co_INVF, CAT_INVF, La_INVF, PL_INVF |            |                |         |             |       |                    |
| df = degrees of freedom; F = F value; p = p value                                                             |            |                |         |             |       |                    |

| Coefficients <sup>a</sup>                                                                           |            |                |        |                           |        |       |
|-----------------------------------------------------------------------------------------------------|------------|----------------|--------|---------------------------|--------|-------|
| Model                                                                                               |            | Unstandardized |        | Standardized Coefficients | t      | p     |
|                                                                                                     |            | B              | SE     | $\beta$                   |        |       |
| 1                                                                                                   | (Constant) | 31,900         | 8,262  |                           | 3,861  | 0,000 |
|                                                                                                     | Sex        | 1,172          | 0,786  | 0,119                     | 1,492  | 0,137 |
|                                                                                                     | Age        | -0,074         | 0,103  | -0,052                    | -0,717 | 0,474 |
|                                                                                                     | AAA_INVF   | -17,554        | 25,723 | -0,074                    | -0,682 | 0,496 |
|                                                                                                     | AB_INVF    | -0,826         | 5,369  | -0,011                    | -0,154 | 0,878 |
|                                                                                                     | Ba_INVF    | 7,223          | 33,116 | 0,024                     | 0,218  | 0,828 |
|                                                                                                     | Ce_INVF    | -0,159         | 6,687  | -0,002                    | -0,024 | 0,981 |
|                                                                                                     | Co_INVF    | -15,424        | 9,899  | -0,118                    | -1,558 | 0,121 |
|                                                                                                     | CAT_INVF   | 2,238          | 3,855  | 0,040                     | 0,581  | 0,562 |
|                                                                                                     | La_INVF    | -36,217        | 24,174 | -0,139                    | -1,498 | 0,136 |
|                                                                                                     | PL_INVF    | 6,014          | 5,225  | 0,079                     | 1,151  | 0,251 |
| a. Dependent Variable: Angry hostility                                                              |            |                |        |                           |        |       |
| B = unstandardized beta; SE = standard error; $\beta$ = standardized beta; t = t value; p = p value |            |                |        |                           |        |       |

| Model Summary                                                                                         |                    |          |                   |                    |       |
|-------------------------------------------------------------------------------------------------------|--------------------|----------|-------------------|--------------------|-------|
| Model                                                                                                 | R                  | R Square | Adjusted R Square | SE of the Estimate | $f^2$ |
| 1                                                                                                     | 0,379 <sup>a</sup> | 0,144    | 0,101             | 4,657              | 0,168 |
| a. Predictors: (Constant), Sex, Age, AAA_ODI, AB_ODI, Ba_ODI, Ce_ODI, Co_ODI, CAT_ODI, La_ODI, PL_ODI |                    |          |                   |                    |       |
| R = R value; SE = standard error; $f^2$ = Cohen's $f^2$                                               |                    |          |                   |                    |       |

| ANOVA <sup>a</sup>                                                                                    |            |                |         |             |       |                    |
|-------------------------------------------------------------------------------------------------------|------------|----------------|---------|-------------|-------|--------------------|
| Model                                                                                                 |            | Sum of Squares | df      | Mean Square | F     | p                  |
| 1                                                                                                     | Regression | 730,735        | 10,000  | 73,073      | 3,369 | 0,000 <sup>b</sup> |
|                                                                                                       | Residual   | 4359,269       | 201,000 | 21,688      |       |                    |
|                                                                                                       | Total      | 5090,004       | 211,000 |             |       |                    |
| a. Dependent Variable: Angry hostility                                                                |            |                |         |             |       |                    |
| b. Predictors: (Constant), Sex, Age, AAA_ODI, AB_ODI, Ba_ODI, Ce_ODI, Co_ODI, CAT_ODI, La_ODI, PL_ODI |            |                |         |             |       |                    |
| df = degrees of freedom; F = F value; p = p value                                                     |            |                |         |             |       |                    |

| Coefficients <sup>a</sup>                                                                           |            |                             |        |                           |        |       |
|-----------------------------------------------------------------------------------------------------|------------|-----------------------------|--------|---------------------------|--------|-------|
| Model                                                                                               |            | Unstandardized Coefficients |        | Standardized Coefficients | t      | p     |
|                                                                                                     |            | B                           | SE     | $\beta$                   |        |       |
| 1                                                                                                   | (Constant) | 18,469                      | 6,818  |                           | 2,709  | 0,007 |
|                                                                                                     | Sex        | 2,030                       | 0,657  | 0,207                     | 3,088  | 0,002 |
|                                                                                                     | Age        | -0,172                      | 0,096  | -0,120                    | -1,780 | 0,077 |
|                                                                                                     | AAA_ODI    | -5,649                      | 13,731 | -0,036                    | -0,411 | 0,681 |
|                                                                                                     | AB_ODI     | 3,871                       | 3,093  | 0,090                     | 1,252  | 0,212 |
|                                                                                                     | Ba_ODI     | 22,943                      | 13,668 | 0,146                     | 1,679  | 0,095 |
|                                                                                                     | Ce_ODI     | 1,315                       | 5,173  | 0,018                     | 0,254  | 0,800 |
|                                                                                                     | Co_ODI     | -26,329                     | 11,389 | -0,186                    | -2,312 | 0,022 |
|                                                                                                     | CAT_ODI    | 15,787                      | 5,666  | 0,187                     | 2,786  | 0,006 |
|                                                                                                     | La_ODI     | -18,020                     | 9,423  | -0,154                    | -1,912 | 0,057 |
|                                                                                                     | PL_ODI     | 4,987                       | 2,771  | 0,121                     | 1,800  | 0,073 |
| a. Dependent Variable: Angry hostility                                                              |            |                             |        |                           |        |       |
| B = unstandardized beta; SE = standard error; $\beta$ = standardized beta; t = t value; p = p value |            |                             |        |                           |        |       |

| Model Summary                                                                                         |                    |          |                   |                    |       |
|-------------------------------------------------------------------------------------------------------|--------------------|----------|-------------------|--------------------|-------|
| Model                                                                                                 | R                  | R Square | Adjusted R Square | SE of the Estimate | $f^2$ |
| 1                                                                                                     | 0,319 <sup>a</sup> | 0,102    | -1,181            | 7,254              | 0,114 |
| a. Predictors: (Constant), Sex, Age, AAA_ISO, AB_ISO, Ba_ISO, Ce_ISO, Co_ISO, CAT_ISO, La_ISO, PL_ISO |                    |          |                   |                    |       |
| R = R value; SE = standard error; $f^2$ = Cohen's $f^2$                                               |                    |          |                   |                    |       |

| ANOVA <sup>a</sup>                                                                                    |            |                |        |             |       |                    |
|-------------------------------------------------------------------------------------------------------|------------|----------------|--------|-------------|-------|--------------------|
| Model                                                                                                 |            | Sum of Squares | df     | Mean Square | F     | p                  |
| 1                                                                                                     | Regression | 41,735         | 10,000 | 4,173       | 0,079 | 1,000 <sup>b</sup> |
|                                                                                                       | Residual   | 368,360        | 7,000  | 52,623      |       |                    |
|                                                                                                       | Total      | 410,095        | 17,000 |             |       |                    |
| a. Dependent Variable: Angry hostility                                                                |            |                |        |             |       |                    |
| b. Predictors: (Constant), Sex, Age, AAA_ISO, AB_ISO, Ba_ISO, Ce_ISO, Co_ISO, CAT_ISO, La_ISO, PL_ISO |            |                |        |             |       |                    |
| df = degrees of freedom; F = F value; p = p value                                                     |            |                |        |             |       |                    |

| Coefficients <sup>a</sup>                                                                           |            |                             |        |                           |        |       |
|-----------------------------------------------------------------------------------------------------|------------|-----------------------------|--------|---------------------------|--------|-------|
| Model                                                                                               |            | Unstandardized Coefficients |        | Standardized Coefficients | t      | p     |
|                                                                                                     |            | B                           | SE     | $\beta$                   |        |       |
| 1                                                                                                   | (Constant) | 16,551                      | 17,885 |                           | 0,925  | 0,386 |
|                                                                                                     | Sex        | 2,148                       | 3,659  | 0,219                     | 0,587  | 0,576 |
|                                                                                                     | Age        | -0,159                      | 0,530  | -0,111                    | -0,300 | 0,773 |
|                                                                                                     | AAA_ISO    | -2,514                      | 22,543 | -0,048                    | -0,112 | 0,914 |
|                                                                                                     | AB_ISO     | 4,654                       | 18,571 | 0,106                     | 0,251  | 0,809 |
|                                                                                                     | Ba_ISO     | 1,164                       | 22,397 | 0,022                     | 0,052  | 0,960 |
|                                                                                                     | Ce_ISO     | -1,481                      | 13,244 | -0,046                    | -0,112 | 0,914 |
|                                                                                                     | Co_ISO     | -2,225                      | 20,898 | -0,042                    | -0,106 | 0,918 |
|                                                                                                     | CAT_ISO    | 4,047                       | 13,649 | 0,110                     | 0,296  | 0,775 |
|                                                                                                     | La_ISO     | -4,154                      | 20,844 | -0,075                    | -0,199 | 0,848 |
|                                                                                                     | PL_ISO     | 6,548                       | 26,772 | 0,103                     | 0,245  | 0,814 |
| a. Dependent Variable: Angry hostility                                                              |            |                             |        |                           |        |       |
| B = unstandardized beta; SE = standard error; $\beta$ = standardized beta; t = t value; p = p value |            |                             |        |                           |        |       |

| Model Summary                                                                                         |                    |          |                   |                    |       |
|-------------------------------------------------------------------------------------------------------|--------------------|----------|-------------------|--------------------|-------|
| Model                                                                                                 | R                  | R Square | Adjusted R Square | SE of the Estimate | $f^2$ |
| 1                                                                                                     | 0,200 <sup>a</sup> | 0,040    | -0,006            | 5,888              | 0,042 |
| a. Predictors: (Constant), Sex, Age, AAA_GMV, AB_GMV, Ba_GMV, Ce_GMV, Co_GMV, CAT_GMV, La_GMV, PL_GMV |                    |          |                   |                    |       |
| R = R value; SE = standard error; $f^2$ = Cohen's $f^2$                                               |                    |          |                   |                    |       |

| ANOVA <sup>a</sup>                                                                                    |            |                |         |             |       |                    |
|-------------------------------------------------------------------------------------------------------|------------|----------------|---------|-------------|-------|--------------------|
| Model                                                                                                 |            | Sum of Squares | df      | Mean Square | F     | p                  |
| 1                                                                                                     | Regression | 302,998        | 10,000  | 30,300      | 0,874 | 0,558 <sup>b</sup> |
|                                                                                                       | Residual   | 7280,984       | 210,000 | 34,671      |       |                    |
|                                                                                                       | Total      | 7583,982       | 220,000 |             |       |                    |
| a. Dependent Variable: Depression                                                                     |            |                |         |             |       |                    |
| b. Predictors: (Constant), Sex, Age, AAA_GMV, AB_GMV, Ba_GMV, Ce_GMV, Co_GMV, CAT_GMV, La_GMV, PL_GMV |            |                |         |             |       |                    |
| df = degrees of freedom; F = F value; p = p value                                                     |            |                |         |             |       |                    |

| Coefficients <sup>a</sup>                                                                           |            |                             |       |                           |        |       |
|-----------------------------------------------------------------------------------------------------|------------|-----------------------------|-------|---------------------------|--------|-------|
| Model                                                                                               |            | Unstandardized Coefficients |       | Standardized Coefficients | t      | p     |
|                                                                                                     |            | B                           | SE    | $\beta$                   |        |       |
| 1                                                                                                   | (Constant) | 5,925                       | 6,081 |                           | 0,974  | 0,331 |
|                                                                                                     | Sex        | 2,088                       | 0,956 | 0,178                     | 2,185  | 0,030 |
|                                                                                                     | Age        | -0,076                      | 0,119 | -0,044                    | -0,638 | 0,524 |
|                                                                                                     | AAA_GMV    | -0,020                      | 0,038 | -0,208                    | -0,523 | 0,601 |
|                                                                                                     | AB_GMV     | 0,029                       | 0,049 | 0,072                     | 0,591  | 0,555 |
|                                                                                                     | Ba_GMV     | 0,008                       | 0,029 | 0,131                     | 0,280  | 0,780 |
|                                                                                                     | Ce_GMV     | 0,017                       | 0,046 | 0,040                     | 0,372  | 0,711 |
|                                                                                                     | Co_GMV     | 0,038                       | 0,119 | 0,052                     | 0,324  | 0,747 |
|                                                                                                     | CAT_GMV    | 0,012                       | 0,026 | 0,088                     | 0,467  | 0,641 |
|                                                                                                     | La_GMV     | -0,004                      | 0,007 | -0,083                    | -0,512 | 0,609 |
|                                                                                                     | PL_GMV     | 0,028                       | 0,127 | 0,053                     | 0,221  | 0,825 |
| a. Dependent Variable: Depression                                                                   |            |                             |       |                           |        |       |
| B = unstandardized beta; SE = standard error; $\beta$ = standardized beta; t = t value; p = p value |            |                             |       |                           |        |       |

| Model Summary                                                                                                 |                    |          |                   |                    |       |
|---------------------------------------------------------------------------------------------------------------|--------------------|----------|-------------------|--------------------|-------|
| Model                                                                                                         | R                  | R Square | Adjusted R Square | SE of the Estimate | $f^2$ |
| 1                                                                                                             | 0,318 <sup>a</sup> | 0,101    | 0,057             | 5,703              | 0,112 |
| a. Predictors: (Constant), Sex, Age, AAA_INVF, AB_INVF, Ba_INVF, Ce_INVF, Co_INVF, CAT_INVF, La_INVF, PL_INVF |                    |          |                   |                    |       |
| R = R value; SE = standard error; $f^2$ = Cohen's $f^2$                                                       |                    |          |                   |                    |       |

| ANOVA <sup>a</sup>                                                                                            |            |                |         |             |       |                    |
|---------------------------------------------------------------------------------------------------------------|------------|----------------|---------|-------------|-------|--------------------|
| Model                                                                                                         |            | Sum of Squares | df      | Mean Square | F     | p                  |
| 1                                                                                                             | Regression | 736,381        | 10,000  | 73,638      | 2,264 | 0,016 <sup>b</sup> |
|                                                                                                               | Residual   | 6537,347       | 201,000 | 32,524      |       |                    |
|                                                                                                               | Total      | 7273,728       | 211,000 |             |       |                    |
| a. Dependent Variable: Depression                                                                             |            |                |         |             |       |                    |
| b. Predictors: (Constant), Sex, Age, AAA_INVF, AB_INVF, Ba_INVF, Ce_INVF, Co_INVF, CAT_INVF, La_INVF, PL_INVF |            |                |         |             |       |                    |
| df = degrees of freedom; F = F value; p = p value                                                             |            |                |         |             |       |                    |

| Coefficients <sup>a</sup>                                                                           |            |                             |        |                           |        |       |
|-----------------------------------------------------------------------------------------------------|------------|-----------------------------|--------|---------------------------|--------|-------|
| Model                                                                                               |            | Unstandardized Coefficients |        | Standardized Coefficients | t      | p     |
|                                                                                                     |            | B                           | SE     | $\beta$                   |        |       |
| 1                                                                                                   | (Constant) | 34,863                      | 9,922  |                           | 3,513  | 0,001 |
|                                                                                                     | Sex        | 0,283                       | 0,944  | 0,024                     | 0,300  | 0,764 |
|                                                                                                     | Age        | -0,002                      | 0,124  | -0,001                    | -0,018 | 0,986 |
|                                                                                                     | AAA_INVF   | 4,445                       | 30,894 | 0,016                     | 0,144  | 0,886 |
|                                                                                                     | AB_INVF    | 0,450                       | 6,448  | 0,005                     | 0,070  | 0,944 |
|                                                                                                     | Ba_INVF    | 38,563                      | 39,772 | 0,105                     | 0,970  | 0,333 |
|                                                                                                     | Ce_INVF    | 3,547                       | 8,031  | 0,033                     | 0,442  | 0,659 |
|                                                                                                     | Co_INVF    | -22,091                     | 11,889 | -0,141                    | -1,858 | 0,065 |
|                                                                                                     | CAT_INVF   | 0,109                       | 4,629  | 0,002                     | 0,023  | 0,981 |
|                                                                                                     | La_INVF    | -98,108                     | 29,033 | -0,315                    | -3,379 | 0,001 |
|                                                                                                     | PL_INVF    | 7,162                       | 6,275  | 0,079                     | 1,141  | 0,255 |
| a. Dependent Variable: Depression                                                                   |            |                             |        |                           |        |       |
| B = unstandardized beta; SE = standard error; $\beta$ = standardized beta; t = t value; p = p value |            |                             |        |                           |        |       |

| Model Summary                                                                                         |                    |          |                   |                    |       |
|-------------------------------------------------------------------------------------------------------|--------------------|----------|-------------------|--------------------|-------|
| Model                                                                                                 | R                  | R Square | Adjusted R Square | SE of the Estimate | $f^2$ |
| 1                                                                                                     | 0,220 <sup>a</sup> | 0,048    | 0,001             | 5,869              | 0,050 |
| a. Predictors: (Constant), Sex, Age, AAA_ODI, AB_ODI, Ba_ODI, Ce_ODI, Co_ODI, CAT_ODI, La_ODI, PL_ODI |                    |          |                   |                    |       |
| R = R value; SE = standard error; $f^2$ = Cohen's $f^2$                                               |                    |          |                   |                    |       |

| ANOVA <sup>a</sup>                                                                                    |            |                |         |             |       |                    |
|-------------------------------------------------------------------------------------------------------|------------|----------------|---------|-------------|-------|--------------------|
| Model                                                                                                 |            | Sum of Squares | df      | Mean Square | F     | p                  |
| 1                                                                                                     | Regression | 351,106        | 10,000  | 35,111      | 1,019 | 0,428 <sup>b</sup> |
|                                                                                                       | Residual   | 6922,623       | 201,000 | 34,441      |       |                    |
|                                                                                                       | Total      | 7273,728       | 211,000 |             |       |                    |
| a. Dependent Variable: Depression                                                                     |            |                |         |             |       |                    |
| b. Predictors: (Constant), Sex, Age, AAA_ODI, AB_ODI, Ba_ODI, Ce_ODI, Co_ODI, CAT_ODI, La_ODI, PL_ODI |            |                |         |             |       |                    |
| df = degrees of freedom; F = F value; p = p value                                                     |            |                |         |             |       |                    |

| Coefficients <sup>a</sup>                                                                           |            |                             |        |                           |        |       |
|-----------------------------------------------------------------------------------------------------|------------|-----------------------------|--------|---------------------------|--------|-------|
| Model                                                                                               |            | Unstandardized Coefficients |        | Standardized Coefficients | t      | p     |
|                                                                                                     |            | B                           | SE     | $\beta$                   |        |       |
| 1                                                                                                   | (Constant) | 13,727                      | 8,592  |                           | 1,598  | 0,112 |
|                                                                                                     | Sex        | 1,535                       | 0,828  | 0,131                     | 1,854  | 0,065 |
|                                                                                                     | Age        | -0,096                      | 0,122  | -0,056                    | -0,791 | 0,430 |
|                                                                                                     | AAA_ODI    | 1,778                       | 17,303 | 0,009                     | 0,103  | 0,918 |
|                                                                                                     | AB_ODI     | 0,993                       | 3,897  | 0,019                     | 0,255  | 0,799 |
|                                                                                                     | Ba_ODI     | 6,459                       | 17,224 | 0,034                     | 0,375  | 0,708 |
|                                                                                                     | Ce_ODI     | 1,590                       | 6,519  | 0,018                     | 0,244  | 0,808 |
|                                                                                                     | Co_ODI     | -5,893                      | 14,353 | -0,035                    | -0,411 | 0,682 |
|                                                                                                     | CAT_ODI    | 8,291                       | 7,140  | 0,082                     | 1,161  | 0,247 |
|                                                                                                     | La_ODI     | -14,577                     | 11,875 | -0,104                    | -1,228 | 0,221 |
|                                                                                                     | PL_ODI     | 5,145                       | 3,492  | 0,104                     | 1,473  | 0,142 |
| a. Dependent Variable: Depression                                                                   |            |                             |        |                           |        |       |
| B = unstandardized beta; SE = standard error; $\beta$ = standardized beta; t = t value; p = p value |            |                             |        |                           |        |       |

| Model Summary                                                                                         |                    |          |                   |                    |       |
|-------------------------------------------------------------------------------------------------------|--------------------|----------|-------------------|--------------------|-------|
| Model                                                                                                 | R                  | R Square | Adjusted R Square | SE of the Estimate | $f^2$ |
| 1                                                                                                     | 0,292 <sup>a</sup> | 0,085    | -1,221            | 8,751              | 0,093 |
| a. Predictors: (Constant), Sex, Age, AAA_ISO, AB_ISO, Ba_ISO, Ce_ISO, Co_ISO, CAT_ISO, La_ISO, PL_ISO |                    |          |                   |                    |       |
| R = R value; SE = standard error; $f^2$ = Cohen's $f^2$                                               |                    |          |                   |                    |       |

| ANOVA <sup>a</sup>                                                                                    |            |                |        |             |       |                    |
|-------------------------------------------------------------------------------------------------------|------------|----------------|--------|-------------|-------|--------------------|
| Model                                                                                                 |            | Sum of Squares | df     | Mean Square | F     | p                  |
| 1                                                                                                     | Regression | 50,036         | 10,000 | 5,004       | 0,065 | 1,000 <sup>b</sup> |
|                                                                                                       | Residual   | 535,999        | 7,000  | 76,571      |       |                    |
|                                                                                                       | Total      | 586,035        | 17,000 |             |       |                    |
| a. Dependent Variable: Depression                                                                     |            |                |        |             |       |                    |
| b. Predictors: (Constant), Sex, Age, AAA_ISO, AB_ISO, Ba_ISO, Ce_ISO, Co_ISO, CAT_ISO, La_ISO, PL_ISO |            |                |        |             |       |                    |
| df = degrees of freedom; F = F value; p = p value                                                     |            |                |        |             |       |                    |

| Coefficients <sup>a</sup>                                                                           |            |                             |        |                           |        |       |
|-----------------------------------------------------------------------------------------------------|------------|-----------------------------|--------|---------------------------|--------|-------|
| Model                                                                                               |            | Unstandardized Coefficients |        | Standardized Coefficients | t      | p     |
|                                                                                                     |            | B                           | SE     | $\beta$                   |        |       |
| 1                                                                                                   | (Constant) | 20,038                      | 21,575 |                           | 0,929  | 0,384 |
|                                                                                                     | Sex        | 1,827                       | 4,414  | 0,156                     | 0,414  | 0,691 |
|                                                                                                     | Age        | -0,047                      | 0,639  | -0,027                    | -0,073 | 0,944 |
|                                                                                                     | AAA_ISO    | 1,224                       | 27,193 | 0,019                     | 0,045  | 0,965 |
|                                                                                                     | AB_ISO     | 0,165                       | 22,402 | 0,003                     | 0,007  | 0,994 |
|                                                                                                     | Ba_ISO     | -5,231                      | 27,016 | -0,083                    | -0,194 | 0,852 |
|                                                                                                     | Ce_ISO     | 0,440                       | 15,976 | 0,011                     | 0,028  | 0,979 |
|                                                                                                     | Co_ISO     | -4,226                      | 25,208 | -0,067                    | -0,168 | 0,872 |
|                                                                                                     | CAT_ISO    | 2,573                       | 16,464 | 0,059                     | 0,156  | 0,880 |
|                                                                                                     | La_ISO     | -11,439                     | 25,144 | -0,172                    | -0,455 | 0,663 |
|                                                                                                     | PL_ISO     | -12,802                     | 32,294 | -0,168                    | -0,396 | 0,704 |
| a. Dependent Variable: Depression                                                                   |            |                             |        |                           |        |       |
| B = unstandardized beta; SE = standard error; $\beta$ = standardized beta; t = t value; p = p value |            |                             |        |                           |        |       |

| Model Summary                                                                                         |                    |          |                   |                    |       |
|-------------------------------------------------------------------------------------------------------|--------------------|----------|-------------------|--------------------|-------|
| Model                                                                                                 | R                  | R Square | Adjusted R Square | SE of the Estimate | $f^2$ |
| 1                                                                                                     | 0,249 <sup>a</sup> | 0,062    | 0,017             | 4,786              | 0,066 |
| a. Predictors: (Constant), Sex, Age, AAA_GMV, AB_GMV, Ba_GMV, Ce_GMV, Co_GMV, CAT_GMV, La_GMV, PL_GMV |                    |          |                   |                    |       |
| R = R value; SE = standard error; $f^2$ = Cohen's $f^2$                                               |                    |          |                   |                    |       |

| ANOVA <sup>a</sup>                                                                                    |            |                |         |             |       |                    |
|-------------------------------------------------------------------------------------------------------|------------|----------------|---------|-------------|-------|--------------------|
| Model                                                                                                 |            | Sum of Squares | df      | Mean Square | F     | p                  |
| 1                                                                                                     | Regression | 318,156        | 10,000  | 31,816      | 1,389 | 0,187 <sup>b</sup> |
|                                                                                                       | Residual   | 4810,604       | 210,000 | 22,908      |       |                    |
|                                                                                                       | Total      | 5128,760       | 220,000 |             |       |                    |
| a. Dependent Variable: Self-Consciousness                                                             |            |                |         |             |       |                    |
| b. Predictors: (Constant), Sex, Age, AAA_GMV, AB_GMV, Ba_GMV, Ce_GMV, Co_GMV, CAT_GMV, La_GMV, PL_GMV |            |                |         |             |       |                    |
| df = degrees of freedom; F = F value; p = p value                                                     |            |                |         |             |       |                    |

| Coefficients <sup>a</sup>                                                                           |            |                             |       |                           |        |       |
|-----------------------------------------------------------------------------------------------------|------------|-----------------------------|-------|---------------------------|--------|-------|
| Model                                                                                               |            | Unstandardized Coefficients |       | Standardized Coefficients | t      | p     |
|                                                                                                     |            | B                           | SE    | $\beta$                   |        |       |
| 1                                                                                                   | (Constant) | 11,814                      | 4,943 |                           | 2,390  | 0,018 |
|                                                                                                     | Sex        | 2,455                       | 0,777 | 0,255                     | 3,160  | 0,002 |
|                                                                                                     | Age        | 0,034                       | 0,097 | 0,024                     | 0,350  | 0,727 |
|                                                                                                     | AAA_GMV    | 0,003                       | 0,031 | 0,032                     | 0,081  | 0,936 |
|                                                                                                     | AB_GMV     | 0,022                       | 0,040 | 0,064                     | 0,535  | 0,593 |
|                                                                                                     | Ba_GMV     | -0,021                      | 0,024 | -0,404                    | -0,875 | 0,383 |
|                                                                                                     | Ce_GMV     | 0,020                       | 0,037 | 0,057                     | 0,535  | 0,594 |
|                                                                                                     | Co_GMV     | 0,052                       | 0,097 | 0,086                     | 0,542  | 0,588 |
|                                                                                                     | CAT_GMV    | 0,002                       | 0,021 | 0,020                     | 0,107  | 0,915 |
|                                                                                                     | La_GMV     | -0,001                      | 0,006 | -0,027                    | -0,169 | 0,866 |
|                                                                                                     | PL_GMV     | 0,127                       | 0,103 | 0,294                     | 1,232  | 0,219 |
| a. Dependent Variable: Self-Consciousness                                                           |            |                             |       |                           |        |       |
| B = unstandardized beta; SE = standard error; $\beta$ = standardized beta; t = t value; p = p value |            |                             |       |                           |        |       |

| Model Summary                                                                                                 |                    |          |                   |                    |       |
|---------------------------------------------------------------------------------------------------------------|--------------------|----------|-------------------|--------------------|-------|
| Model                                                                                                         | R                  | R Square | Adjusted R Square | SE of the Estimate | $f^2$ |
| 1                                                                                                             | 0,257 <sup>a</sup> | 0,066    | 0,019             | 4,781              | 0,071 |
| a. Predictors: (Constant), Sex, Age, AAA_INVF, AB_INVF, Ba_INVF, Ce_INVF, Co_INVF, CAT_INVF, La_INVF, PL_INVF |                    |          |                   |                    |       |
| R = R value; SE = standard error; $f^2$ = Cohen's $f^2$                                                       |                    |          |                   |                    |       |

| ANOVA <sup>a</sup>                                                                                            |            |                |         |             |       |                    |
|---------------------------------------------------------------------------------------------------------------|------------|----------------|---------|-------------|-------|--------------------|
| Model                                                                                                         |            | Sum of Squares | df      | Mean Square | F     | p                  |
| 1                                                                                                             | Regression | 324,399        | 10,000  | 32,440      | 1,419 | 0,174 <sup>b</sup> |
|                                                                                                               | Residual   | 4594,548       | 201,000 | 22,858      |       |                    |
|                                                                                                               | Total      | 4918,947       | 211,000 |             |       |                    |
| a. Dependent Variable: Self-consciousness                                                                     |            |                |         |             |       |                    |
| b. Predictors: (Constant), Sex, Age, AAA_INVF, AB_INVF, Ba_INVF, Ce_INVF, Co_INVF, CAT_INVF, La_INVF, PL_INVF |            |                |         |             |       |                    |
| df = degrees of freedom; F = F value; p = p value                                                             |            |                |         |             |       |                    |

| Coefficients <sup>a</sup>                                                                           |            |                             |        |                           |        |       |
|-----------------------------------------------------------------------------------------------------|------------|-----------------------------|--------|---------------------------|--------|-------|
| Model                                                                                               |            | Unstandardized Coefficients |        | Standardized Coefficients | t      | p     |
|                                                                                                     |            | B                           | SE     | $\beta$                   |        |       |
| 1                                                                                                   | (Constant) | 19,921                      | 8,318  |                           | 2,395  | 0,018 |
|                                                                                                     | Sex        | 1,924                       | 0,791  | 0,199                     | 2,432  | 0,016 |
|                                                                                                     | Age        | 0,071                       | 0,104  | 0,050                     | 0,682  | 0,496 |
|                                                                                                     | AAA_INVF   | -6,381                      | 25,899 | -0,027                    | -0,246 | 0,806 |
|                                                                                                     | AB_INVF    | 5,390                       | 5,406  | 0,071                     | 0,997  | 0,320 |
|                                                                                                     | Ba_INVF    | 13,692                      | 33,343 | 0,045                     | 0,411  | 0,682 |
|                                                                                                     | Ce_INVF    | 0,250                       | 6,733  | 0,003                     | 0,037  | 0,970 |
|                                                                                                     | Co_INVF    | -3,813                      | 9,967  | -0,030                    | -0,383 | 0,702 |
|                                                                                                     | CAT_INVF   | 2,461                       | 3,881  | 0,045                     | 0,634  | 0,527 |
|                                                                                                     | La_INVF    | -26,171                     | 24,340 | -0,102                    | -1,075 | 0,284 |
| PL_INVF                                                                                             | -2,614     | 5,260                       | -0,035 | -0,497                    | 0,620  |       |
| a. Dependent Variable: Self-consciousness                                                           |            |                             |        |                           |        |       |
| B = unstandardized beta; SE = standard error; $\beta$ = standardized beta; t = t value; p = p value |            |                             |        |                           |        |       |

| Model Summary                                                                                         |                    |          |                   |                    |       |
|-------------------------------------------------------------------------------------------------------|--------------------|----------|-------------------|--------------------|-------|
| Model                                                                                                 | R                  | R Square | Adjusted R Square | SE of the Estimate | $f^2$ |
| 1                                                                                                     | 0,299 <sup>a</sup> | 0,090    | 0,044             | 4,720              | 0,099 |
| a. Predictors: (Constant), Sex, Age, AAA_ODI, AB_ODI, Ba_ODI, Ce_ODI, Co_ODI, CAT_ODI, La_ODI, PL_ODI |                    |          |                   |                    |       |
| R = R value; SE = standard error; $f^2$ = Cohen's $f^2$                                               |                    |          |                   |                    |       |

| ANOVA <sup>a</sup>                                                                                    |            |                |         |             |       |                    |
|-------------------------------------------------------------------------------------------------------|------------|----------------|---------|-------------|-------|--------------------|
| Model                                                                                                 |            | Sum of Squares | df      | Mean Square | F     | p                  |
| 1                                                                                                     | Regression | 440,549        | 10,000  | 44,055      | 1,977 | 0,037 <sup>b</sup> |
|                                                                                                       | Residual   | 4478,398       | 201,000 | 22,281      |       |                    |
|                                                                                                       | Total      | 4918,947       | 211,000 |             |       |                    |
| a. Dependent Variable: Self-consciousness                                                             |            |                |         |             |       |                    |
| b. Predictors: (Constant), Sex, Age, AAA_ODI, AB_ODI, Ba_ODI, Ce_ODI, Co_ODI, CAT_ODI, La_ODI, PL_ODI |            |                |         |             |       |                    |
| df = degrees of freedom; F = F value; p = p value                                                     |            |                |         |             |       |                    |

| Coefficients <sup>a</sup>                                                                           |            |                             |        |                           |        |       |
|-----------------------------------------------------------------------------------------------------|------------|-----------------------------|--------|---------------------------|--------|-------|
| Model                                                                                               |            | Unstandardized Coefficients |        | Standardized Coefficients | t      | p     |
|                                                                                                     |            | B                           | SE     | $\beta$                   |        |       |
| 1                                                                                                   | (Constant) | 21,055                      | 6,910  |                           | 3,047  | 0,003 |
|                                                                                                     | Sex        | 2,058                       | 0,666  | 0,213                     | 3,089  | 0,002 |
|                                                                                                     | Age        | 0,039                       | 0,098  | 0,027                     | 0,396  | 0,693 |
|                                                                                                     | AAA_ODI    | -6,021                      | 13,917 | -0,039                    | -0,433 | 0,666 |
|                                                                                                     | AB_ODI     | 2,198                       | 3,135  | 0,052                     | 0,701  | 0,484 |
|                                                                                                     | Ba_ODI     | 20,645                      | 13,854 | 0,134                     | 1,490  | 0,138 |
|                                                                                                     | Ce_ODI     | 0,446                       | 5,244  | 0,006                     | 0,085  | 0,932 |
|                                                                                                     | Co_ODI     | -15,626                     | 11,544 | -0,112                    | -1,354 | 0,177 |
|                                                                                                     | CAT_ODI    | 4,081                       | 5,743  | 0,049                     | 0,711  | 0,478 |
|                                                                                                     | La_ODI     | -24,575                     | 9,551  | -0,214                    | -2,573 | 0,011 |
|                                                                                                     | PL_ODI     | 2,860                       | 2,808  | 0,071                     | 1,018  | 0,310 |
| a. Dependent Variable: Self-consciousness                                                           |            |                             |        |                           |        |       |
| B = unstandardized beta; SE = standard error; $\beta$ = standardized beta; t = t value; p = p value |            |                             |        |                           |        |       |

| Model Summary                                                                                         |                    |          |                   |                    |       |
|-------------------------------------------------------------------------------------------------------|--------------------|----------|-------------------|--------------------|-------|
| Model                                                                                                 | R                  | R Square | Adjusted R Square | SE of the Estimate | $f^2$ |
| 1                                                                                                     | 0,296 <sup>a</sup> | 0,088    | -1,216            | 7,187              | 0,096 |
| a. Predictors: (Constant), Sex, Age, AAA_ISO, AB_ISO, Ba_ISO, Ce_ISO, Co_ISO, CAT_ISO, La_ISO, PL_ISO |                    |          |                   |                    |       |
| R = R value; SE = standard error; $f^2$ = Cohen's $f^2$                                               |                    |          |                   |                    |       |

| ANOVA <sup>a</sup>                                                                                    |            |                |        |             |       |                    |
|-------------------------------------------------------------------------------------------------------|------------|----------------|--------|-------------|-------|--------------------|
| Model                                                                                                 |            | Sum of Squares | df     | Mean Square | F     | p                  |
| 1                                                                                                     | Regression | 34,716         | 10,000 | 3,472       | 0,067 | 1,000 <sup>b</sup> |
|                                                                                                       | Residual   | 361,597        | 7,000  | 51,657      |       |                    |
|                                                                                                       | Total      | 396,313        | 17,000 |             |       |                    |
| a. Dependent Variable: Self-consciousness                                                             |            |                |        |             |       |                    |
| b. Predictors: (Constant), Sex, Age, AAA_ISO, AB_ISO, Ba_ISO, Ce_ISO, Co_ISO, CAT_ISO, La_ISO, PL_ISO |            |                |        |             |       |                    |
| df = degrees of freedom; F = F value; p = p value                                                     |            |                |        |             |       |                    |

| Coefficients <sup>a</sup>                                                                           |            |                             |        |                           |        |       |
|-----------------------------------------------------------------------------------------------------|------------|-----------------------------|--------|---------------------------|--------|-------|
| Model                                                                                               |            | Unstandardized Coefficients |        | Standardized Coefficients | t      | p     |
|                                                                                                     |            | B                           | SE     | $\beta$                   |        |       |
| 1                                                                                                   | (Constant) | 18,431                      | 17,720 |                           | 1,040  | 0,333 |
|                                                                                                     | Sex        | 2,264                       | 3,626  | 0,235                     | 0,624  | 0,552 |
|                                                                                                     | Age        | 0,076                       | 0,525  | 0,054                     | 0,144  | 0,890 |
|                                                                                                     | AAA_ISO    | 2,020                       | 22,335 | 0,039                     | 0,090  | 0,930 |
|                                                                                                     | AB_ISO     | 1,009                       | 18,400 | 0,023                     | 0,055  | 0,958 |
|                                                                                                     | Ba_ISO     | -3,681                      | 22,190 | -0,071                    | -0,166 | 0,873 |
|                                                                                                     | Ce_ISO     | -0,508                      | 13,122 | -0,016                    | -0,039 | 0,970 |
|                                                                                                     | Co_ISO     | -2,266                      | 20,705 | -0,044                    | -0,109 | 0,916 |
|                                                                                                     | CAT_ISO    | 0,829                       | 13,523 | 0,023                     | 0,061  | 0,953 |
|                                                                                                     | La_ISO     | -8,289                      | 20,652 | -0,152                    | -0,401 | 0,700 |
|                                                                                                     | PL_ISO     | -6,227                      | 26,525 | -0,099                    | -0,235 | 0,821 |
| a. Dependent Variable: Self-consciousness                                                           |            |                             |        |                           |        |       |
| B = unstandardized beta; SE = standard error; $\beta$ = standardized beta; t = t value; p = p value |            |                             |        |                           |        |       |

| Model Summary                                                                                         |                    |          |                   |                    |       |
|-------------------------------------------------------------------------------------------------------|--------------------|----------|-------------------|--------------------|-------|
| Model                                                                                                 | R                  | R Square | Adjusted R Square | SE of the Estimate | $f^2$ |
| 1                                                                                                     | 0,224 <sup>a</sup> | 0,050    | 0,005             | 4,443              | 0,053 |
| a. Predictors: (Constant), Sex, Age, AAA_GMV, AB_GMV, Ba_GMV, Ce_GMV, Co_GMV, CAT_GMV, La_GMV, PL_GMV |                    |          |                   |                    |       |
| R = R value; SE = standard error; $f^2$ = Cohen's $f^2$                                               |                    |          |                   |                    |       |

| ANOVA <sup>a</sup>                                                                                    |            |                |         |             |       |                    |
|-------------------------------------------------------------------------------------------------------|------------|----------------|---------|-------------|-------|--------------------|
| Model                                                                                                 |            | Sum of Squares | df      | Mean Square | F     | p                  |
| 1                                                                                                     | Regression | 219,951        | 10,000  | 21,995      | 1,114 | 0,353 <sup>b</sup> |
|                                                                                                       | Residual   | 4145,053       | 210,000 | 19,738      |       |                    |
|                                                                                                       | Total      | 4365,005       | 220,000 |             |       |                    |
| a. Dependent Variable: Impulsivity                                                                    |            |                |         |             |       |                    |
| b. Predictors: (Constant), Sex, Age, AAA_GMV, AB_GMV, Ba_GMV, Ce_GMV, Co_GMV, CAT_GMV, La_GMV, PL_GMV |            |                |         |             |       |                    |
| df = degrees of freedom; F = F value; p = p value                                                     |            |                |         |             |       |                    |

| Coefficients <sup>a</sup>                                                                           |            |                             |       |                           |        |       |
|-----------------------------------------------------------------------------------------------------|------------|-----------------------------|-------|---------------------------|--------|-------|
| Model                                                                                               |            | Unstandardized Coefficients |       | Standardized Coefficients | t      | p     |
|                                                                                                     |            | B                           | SE    | $\beta$                   |        |       |
| 1                                                                                                   | (Constant) | 19,354                      | 4,589 |                           | 4,218  | 0,000 |
|                                                                                                     | Sex        | 1,232                       | 0,721 | 0,139                     | 1,708  | 0,089 |
|                                                                                                     | Age        | -0,178                      | 0,090 | -0,137                    | -1,984 | 0,049 |
|                                                                                                     | AAA_GMV    | -0,025                      | 0,029 | -0,338                    | -0,857 | 0,393 |
|                                                                                                     | AB_GMV     | 0,019                       | 0,037 | 0,061                     | 0,506  | 0,613 |
|                                                                                                     | Ba_GMV     | 0,008                       | 0,022 | 0,178                     | 0,383  | 0,702 |
|                                                                                                     | Ce_GMV     | -0,002                      | 0,034 | -0,008                    | -0,071 | 0,944 |
|                                                                                                     | Co_GMV     | 0,068                       | 0,090 | 0,121                     | 0,756  | 0,450 |
|                                                                                                     | CAT_GMV    | 0,003                       | 0,020 | 0,025                     | 0,136  | 0,892 |
|                                                                                                     | La_GMV     | 0,001                       | 0,006 | 0,041                     | 0,255  | 0,799 |
|                                                                                                     | PL_GMV     | -0,014                      | 0,096 | -0,035                    | -0,144 | 0,886 |
| a. Dependent Variable: Impulsivity                                                                  |            |                             |       |                           |        |       |
| B = unstandardized beta; SE = standard error; $\beta$ = standardized beta; t = t value; p = p value |            |                             |       |                           |        |       |

| Model Summary                                                                                                 |                    |          |                   |                    |       |
|---------------------------------------------------------------------------------------------------------------|--------------------|----------|-------------------|--------------------|-------|
| Model                                                                                                         | R                  | R Square | Adjusted R Square | SE of the Estimate | $f^2$ |
| 1                                                                                                             | 0,344 <sup>a</sup> | 0,119    | 0,075             | 4,285              | 0,135 |
| a. Predictors: (Constant), Sex, Age, AAA_INVF, AB_INVF, Ba_INVF, Ce_INVF, Co_INVF, CAT_INVF, La_INVF, PL_INVF |                    |          |                   |                    |       |
| R = R value; SE = standard error; $f^2$ = Cohen's $f^2$                                                       |                    |          |                   |                    |       |

| ANOVA <sup>a</sup>                                                                                            |            |                |         |             |       |                    |
|---------------------------------------------------------------------------------------------------------------|------------|----------------|---------|-------------|-------|--------------------|
| Model                                                                                                         |            | Sum of Squares | df      | Mean Square | F     | p                  |
| 1                                                                                                             | Regression | 496,397        | 10,000  | 49,640      | 2,704 | 0,004 <sup>b</sup> |
|                                                                                                               | Residual   | 3690,039       | 201,000 | 18,358      |       |                    |
|                                                                                                               | Total      | 4186,436       | 211,000 |             |       |                    |
| a. Dependent Variable: Impulsivity                                                                            |            |                |         |             |       |                    |
| b. Predictors: (Constant), Sex, Age, AAA_INVF, AB_INVF, Ba_INVF, Ce_INVF, Co_INVF, CAT_INVF, La_INVF, PL_INVF |            |                |         |             |       |                    |
| df = degrees of freedom; F = F value; p = p value                                                             |            |                |         |             |       |                    |

| Coefficients <sup>a</sup>                                                                           |            |                             |        |                           |        |       |
|-----------------------------------------------------------------------------------------------------|------------|-----------------------------|--------|---------------------------|--------|-------|
| Model                                                                                               |            | Unstandardized Coefficients |        | Standardized Coefficients | t      | p     |
|                                                                                                     |            | B                           | SE     | $\beta$                   |        |       |
| 1                                                                                                   | (Constant) | 32,968                      | 7,455  |                           | 4,422  | 0,000 |
|                                                                                                     | Sex        | 0,545                       | 0,709  | 0,061                     | 0,768  | 0,443 |
|                                                                                                     | Age        | -0,101                      | 0,093  | -0,078                    | -1,088 | 0,278 |
|                                                                                                     | AAA_INVF   | -54,676                     | 23,210 | -0,255                    | -2,356 | 0,019 |
|                                                                                                     | AB_INVF    | 5,277                       | 4,845  | 0,076                     | 1,089  | 0,277 |
|                                                                                                     | Ba_INVF    | 15,436                      | 29,881 | 0,055                     | 0,517  | 0,606 |
|                                                                                                     | Ce_INVF    | 8,799                       | 6,034  | 0,109                     | 1,458  | 0,146 |
|                                                                                                     | Co_INVF    | -5,907                      | 8,932  | -0,050                    | -0,661 | 0,509 |
|                                                                                                     | CAT_INVF   | 0,365                       | 3,478  | 0,007                     | 0,105  | 0,916 |
|                                                                                                     | La_INVF    | -20,628                     | 21,813 | -0,087                    | -0,946 | 0,345 |
|                                                                                                     | PL_INVF    | 8,833                       | 4,714  | 0,128                     | 1,874  | 0,062 |
| a. Dependent Variable: Impulsivity                                                                  |            |                             |        |                           |        |       |
| B = unstandardized beta; SE = standard error; $\beta$ = standardized beta; t = t value; p = p value |            |                             |        |                           |        |       |

| Model Summary                                                                                         |                    |          |                   |                    |       |
|-------------------------------------------------------------------------------------------------------|--------------------|----------|-------------------|--------------------|-------|
| Model                                                                                                 | R                  | R Square | Adjusted R Square | SE of the Estimate | $f^2$ |
| 1                                                                                                     | 0,255 <sup>a</sup> | 0,065    | 0,019             | 4,413              | 0,070 |
| a. Predictors: (Constant), Sex, Age, AAA_ODI, AB_ODI, Ba_ODI, Ce_ODI, Co_ODI, CAT_ODI, La_ODI, PL_ODI |                    |          |                   |                    |       |
| R = R value; SE = standard error; $f^2$ = Cohen's $f^2$                                               |                    |          |                   |                    |       |

| ANOVA <sup>a</sup>                                                                                    |            |                |         |             |       |                    |
|-------------------------------------------------------------------------------------------------------|------------|----------------|---------|-------------|-------|--------------------|
| Model                                                                                                 |            | Sum of Squares | df      | Mean Square | F     | p                  |
| 1                                                                                                     | Regression | 272,603        | 10,000  | 27,260      | 1,400 | 0,182 <sup>b</sup> |
|                                                                                                       | Residual   | 3913,833       | 201,000 | 19,472      |       |                    |
|                                                                                                       | Total      | 4186,436       | 211,000 |             |       |                    |
| a. Dependent Variable: Impulsivity                                                                    |            |                |         |             |       |                    |
| a. Predictors: (Constant), Sex, Age, AAA_ODI, AB_ODI, Ba_ODI, Ce_ODI, Co_ODI, CAT_ODI, La_ODI, PL_ODI |            |                |         |             |       |                    |
| df = degrees of freedom; F = F value; p = p value                                                     |            |                |         |             |       |                    |

| Coefficients <sup>a</sup>                                                                           |            |                             |        |                           |        |       |
|-----------------------------------------------------------------------------------------------------|------------|-----------------------------|--------|---------------------------|--------|-------|
| Model                                                                                               |            | Unstandardized Coefficients |        | Standardized Coefficients | t      | p     |
|                                                                                                     |            | B                           | SE     | $\beta$                   |        |       |
| 1                                                                                                   | (Constant) | 19,554                      | 6,460  |                           | 3,027  | 0,003 |
|                                                                                                     | Sex        | 1,218                       | 0,623  | 0,137                     | 1,956  | 0,052 |
|                                                                                                     | Age        | -0,175                      | 0,091  | -0,135                    | -1,920 | 0,056 |
|                                                                                                     | AAA_ODI    | -6,128                      | 13,011 | -0,043                    | -0,471 | 0,638 |
|                                                                                                     | AB_ODI     | 1,026                       | 2,930  | 0,026                     | 0,350  | 0,727 |
|                                                                                                     | Ba_ODI     | 4,003                       | 12,951 | 0,028                     | 0,309  | 0,758 |
|                                                                                                     | Ce_ODI     | -0,463                      | 4,902  | -0,007                    | -0,094 | 0,925 |
|                                                                                                     | Co_ODI     | 3,668                       | 10,792 | 0,029                     | 0,340  | 0,734 |
|                                                                                                     | CAT_ODI    | 4,406                       | 5,369  | 0,058                     | 0,821  | 0,413 |
|                                                                                                     | La_ODI     | -6,436                      | 8,929  | -0,061                    | -0,721 | 0,472 |
|                                                                                                     | PL_ODI     | 4,657                       | 2,625  | 0,124                     | 1,774  | 0,078 |
| a. Dependent Variable: Impulsivity                                                                  |            |                             |        |                           |        |       |
| B = unstandardized beta; SE = standard error; $\beta$ = standardized beta; t = t value; p = p value |            |                             |        |                           |        |       |

| Model Summary                                                                                         |                    |          |                   |                    |       |
|-------------------------------------------------------------------------------------------------------|--------------------|----------|-------------------|--------------------|-------|
| Model                                                                                                 | R                  | R Square | Adjusted R Square | SE of the Estimate | $f^2$ |
| 1                                                                                                     | 0,240 <sup>a</sup> | 0,058    | -1,288            | 6,738              | 0,062 |
| a. Predictors: (Constant), Sex, Age, AAA_ISO, AB_ISO, Ba_ISO, Ce_ISO, Co_ISO, CAT_ISO, La_ISO, PL_ISO |                    |          |                   |                    |       |
| R = R value; SE = standard error; $f^2$ = Cohen's $f^2$                                               |                    |          |                   |                    |       |

| ANOVA <sup>a</sup>                                                                                    |            |                |        |             |       |                    |
|-------------------------------------------------------------------------------------------------------|------------|----------------|--------|-------------|-------|--------------------|
| Model                                                                                                 |            | Sum of Squares | df     | Mean Square | F     | p                  |
| 1                                                                                                     | Regression | 19,479         | 10,000 | 1,948       | 0,043 | 1,000 <sup>b</sup> |
|                                                                                                       | Residual   | 317,817        | 7,000  | 45,402      |       |                    |
|                                                                                                       | Total      | 337,296        | 17,000 |             |       |                    |
| a. Dependent Variable: Impulsivity                                                                    |            |                |        |             |       |                    |
| b. Predictors: (Constant), Sex, Age, AAA_ISO, AB_ISO, Ba_ISO, Ce_ISO, Co_ISO, CAT_ISO, La_ISO, PL_ISO |            |                |        |             |       |                    |
| df = degrees of freedom; F = F value; p = p value                                                     |            |                |        |             |       |                    |

| Coefficients <sup>a</sup>                                                                           |            |                             |        |                           |        |       |
|-----------------------------------------------------------------------------------------------------|------------|-----------------------------|--------|---------------------------|--------|-------|
| Model                                                                                               |            | Unstandardized Coefficients |        | Standardized Coefficients | t      | p     |
|                                                                                                     |            | B                           | SE     | $\beta$                   |        |       |
| 1                                                                                                   | (Constant) | 24,129                      | 16,613 |                           | 1,452  | 0,190 |
|                                                                                                     | Sex        | 1,276                       | 3,399  | 0,143                     | 0,376  | 0,718 |
|                                                                                                     | Age        | -0,172                      | 0,492  | -0,132                    | -0,348 | 0,738 |
|                                                                                                     | AAA_ISO    | -3,321                      | 20,939 | -0,069                    | -0,159 | 0,878 |
|                                                                                                     | AB_ISO     | -0,292                      | 17,250 | -0,007                    | -0,017 | 0,987 |
|                                                                                                     | Ba_ISO     | -1,186                      | 20,803 | -0,025                    | -0,057 | 0,956 |
|                                                                                                     | Ce_ISO     | 1,722                       | 12,302 | 0,059                     | 0,140  | 0,893 |
|                                                                                                     | Co_ISO     | -1,191                      | 19,411 | -0,025                    | -0,061 | 0,953 |
|                                                                                                     | CAT_ISO    | -0,313                      | 12,678 | -0,009                    | -0,025 | 0,981 |
|                                                                                                     | La_ISO     | -4,078                      | 19,362 | -0,081                    | -0,211 | 0,839 |
|                                                                                                     | PL_ISO     | -5,306                      | 24,868 | -0,092                    | -0,213 | 0,837 |
| a. Dependent Variable: Impulsivity                                                                  |            |                             |        |                           |        |       |
| B = unstandardized beta; SE = standard error; $\beta$ = standardized beta; t = t value; p = p value |            |                             |        |                           |        |       |

| Model Summary                                                                                         |                    |          |                   |                    |       |
|-------------------------------------------------------------------------------------------------------|--------------------|----------|-------------------|--------------------|-------|
| Model                                                                                                 | R                  | R Square | Adjusted R Square | SE of the Estimate | $f^2$ |
| 1                                                                                                     | 0,279 <sup>a</sup> | 0,078    | 0,034             | 4,631              | 0,085 |
| a. Predictors: (Constant), Sex, Age, AAA_GMV, AB_GMV, Ba_GMV, Ce_GMV, Co_GMV, CAT_GMV, La_GMV, PL_GMV |                    |          |                   |                    |       |
| R = R value; SE = standard error; $f^2$ = Cohen's $f^2$                                               |                    |          |                   |                    |       |

| ANOVA <sup>a</sup>                                                                                    |            |                |         |             |       |                    |
|-------------------------------------------------------------------------------------------------------|------------|----------------|---------|-------------|-------|--------------------|
| Model                                                                                                 |            | Sum of Squares | df      | Mean Square | F     | p                  |
| 1                                                                                                     | Regression | 380,930        | 10,000  | 38,093      | 1,776 | 0,067 <sup>b</sup> |
|                                                                                                       | Residual   | 4504,617       | 210,000 | 21,451      |       |                    |
|                                                                                                       | Total      | 4885,548       | 220,000 |             |       |                    |
| a. Dependent Variable: Vulnerability                                                                  |            |                |         |             |       |                    |
| b. Predictors: (Constant), Sex, Age, AAA_GMV, AB_GMV, Ba_GMV, Ce_GMV, Co_GMV, CAT_GMV, La_GMV, PL_GMV |            |                |         |             |       |                    |
| df = degrees of freedom; F = F value; p = p value                                                     |            |                |         |             |       |                    |

| Coefficients <sup>a</sup>                                                                           |            |                             |       |                           |        |       |
|-----------------------------------------------------------------------------------------------------|------------|-----------------------------|-------|---------------------------|--------|-------|
| Model                                                                                               |            | Unstandardized Coefficients |       | Standardized Coefficients | t      | p     |
|                                                                                                     |            | B                           | SE    | $\beta$                   |        |       |
| 1                                                                                                   | (Constant) | 7,243                       | 4,783 |                           | 1,514  | 0,132 |
|                                                                                                     | Sex        | 2,608                       | 0,752 | 0,277                     | 3,468  | 0,001 |
|                                                                                                     | Age        | -0,123                      | 0,094 | -0,089                    | -1,311 | 0,191 |
|                                                                                                     | AAA_GMV    | 0,004                       | 0,030 | 0,047                     | 0,120  | 0,905 |
|                                                                                                     | AB_GMV     | 0,017                       | 0,039 | 0,053                     | 0,448  | 0,655 |
|                                                                                                     | Ba_GMV     | -0,028                      | 0,023 | -0,560                    | -1,220 | 0,224 |
|                                                                                                     | Ce_GMV     | 0,009                       | 0,036 | 0,027                     | 0,255  | 0,799 |
|                                                                                                     | Co_GMV     | -0,012                      | 0,093 | -0,020                    | -0,128 | 0,898 |
|                                                                                                     | CAT_GMV    | 0,013                       | 0,020 | 0,116                     | 0,628  | 0,531 |
|                                                                                                     | La_GMV     | 0,006                       | 0,006 | 0,169                     | 1,064  | 0,288 |
|                                                                                                     | PL_GMV     | 0,133                       | 0,100 | 0,314                     | 1,327  | 0,186 |
| a. Dependent Variable: Vulnerability                                                                |            |                             |       |                           |        |       |
| B = unstandardized beta; SE = standard error; $\beta$ = standardized beta; t = t value; p = p value |            |                             |       |                           |        |       |

| Model Summary                                                                                                 |                    |          |                   |                    |       |
|---------------------------------------------------------------------------------------------------------------|--------------------|----------|-------------------|--------------------|-------|
| Model                                                                                                         | R                  | R Square | Adjusted R Square | SE of the Estimate | $f^2$ |
| 1                                                                                                             | 0,325 <sup>a</sup> | 0,105    | 0,061             | 4,567              | 0,117 |
| a. Predictors: (Constant), Sex, Age, AAA_INVF, AB_INVF, Ba_INVF, Ce_INVF, Co_INVF, CAT_INVF, La_INVF, PL_INVF |                    |          |                   |                    |       |
| R = R value; SE = standard error; $f^2$ = Cohen's $f^2$                                                       |                    |          |                   |                    |       |

| ANOVA <sup>a</sup>                                                                                            |            |                |         |             |       |                    |
|---------------------------------------------------------------------------------------------------------------|------------|----------------|---------|-------------|-------|--------------------|
| Model                                                                                                         |            | Sum of Squares | df      | Mean Square | F     | p                  |
| 1                                                                                                             | Regression | 494,062        | 10,000  | 49,406      | 2,369 | 0,011 <sup>b</sup> |
|                                                                                                               | Residual   | 4191,622       | 201,000 | 20,854      |       |                    |
|                                                                                                               | Total      | 4685,684       | 211,000 |             |       |                    |
| a. Dependent Variable: Vulnerability                                                                          |            |                |         |             |       |                    |
| b. Predictors: (Constant), Sex, Age, AAA_INVF, AB_INVF, Ba_INVF, Ce_INVF, Co_INVF, CAT_INVF, La_INVF, PL_INVF |            |                |         |             |       |                    |
| df = degrees of freedom; F = F value; p = p value                                                             |            |                |         |             |       |                    |

| Coefficients <sup>a</sup>                                                                           |            |                             |        |                           |        |       |
|-----------------------------------------------------------------------------------------------------|------------|-----------------------------|--------|---------------------------|--------|-------|
| Model                                                                                               |            | Unstandardized Coefficients |        | Standardized Coefficients | t      | p     |
|                                                                                                     |            | B                           | SE     | $\beta$                   |        |       |
| 1                                                                                                   | (Constant) | 28,281                      | 7,945  |                           | 3,559  | 0,000 |
|                                                                                                     | Sex        | 1,036                       | 0,756  | 0,110                     | 1,371  | 0,172 |
|                                                                                                     | Age        | -0,054                      | 0,099  | -0,039                    | -0,540 | 0,590 |
|                                                                                                     | AAA_INVF   | 20,051                      | 24,738 | 0,088                     | 0,811  | 0,419 |
|                                                                                                     | AB_INVF    | 0,814                       | 5,163  | 0,011                     | 0,158  | 0,875 |
|                                                                                                     | Ba_INVF    | 8,950                       | 31,847 | 0,030                     | 0,281  | 0,779 |
|                                                                                                     | Ce_INVF    | -5,542                      | 6,431  | -0,065                    | -0,862 | 0,390 |
|                                                                                                     | Co_INVF    | -13,387                     | 9,520  | -0,107                    | -1,406 | 0,161 |
|                                                                                                     | CAT_INVF   | 3,541                       | 3,707  | 0,066                     | 0,955  | 0,341 |
|                                                                                                     | La_INVF    | -64,634                     | 23,248 | -0,259                    | -2,780 | 0,006 |
|                                                                                                     | PL_INVF    | 3,696                       | 5,025  | 0,051                     | 0,736  | 0,463 |
| a. Dependent Variable: Vulnerability                                                                |            |                             |        |                           |        |       |
| B = unstandardized beta; SE = standard error; $\beta$ = standardized beta; t = t value; p = p value |            |                             |        |                           |        |       |

| Model Summary                                                                                         |                    |          |                   |                    |       |
|-------------------------------------------------------------------------------------------------------|--------------------|----------|-------------------|--------------------|-------|
| Model                                                                                                 | R                  | R Square | Adjusted R Square | SE of the Estimate | $f^2$ |
| 1                                                                                                     | 0,314 <sup>a</sup> | 0,099    | 0,054             | 4,584              | 0,110 |
| a. Predictors: (Constant), Sex, Age, AAA_ODI, AB_ODI, Ba_ODI, Ce_ODI, Co_ODI, CAT_ODI, La_ODI, PL_ODI |                    |          |                   |                    |       |
| R = R value; SE = standard error; $f^2$ = Cohen's $f^2$                                               |                    |          |                   |                    |       |

| ANOVA <sup>a</sup>                                                                                    |            |                |         |             |       |                    |
|-------------------------------------------------------------------------------------------------------|------------|----------------|---------|-------------|-------|--------------------|
| Model                                                                                                 |            | Sum of Squares | df      | Mean Square | F     | p                  |
| 1                                                                                                     | Regression | 462,635        | 10,000  | 46,263      | 2,202 | 0,019 <sup>b</sup> |
|                                                                                                       | Residual   | 4223,049       | 201,000 | 21,010      |       |                    |
|                                                                                                       | Total      | 4685,684       | 211,000 |             |       |                    |
| a. Dependent Variable: Vulnerability                                                                  |            |                |         |             |       |                    |
| b. Predictors: (Constant), Sex, Age, AAA_ODI, AB_ODI, Ba_ODI, Ce_ODI, Co_ODI, CAT_ODI, La_ODI, PL_ODI |            |                |         |             |       |                    |
| df = degrees of freedom; F = F value; p = p value                                                     |            |                |         |             |       |                    |

| Coefficients <sup>a</sup>                                                                           |            |                             |        |                           |        |       |
|-----------------------------------------------------------------------------------------------------|------------|-----------------------------|--------|---------------------------|--------|-------|
| Model                                                                                               |            | Unstandardized Coefficients |        | Standardized Coefficients | t      | p     |
|                                                                                                     |            | B                           | SE     | $\beta$                   |        |       |
| 1                                                                                                   | (Constant) | 19,163                      | 6,711  |                           | 2,856  | 0,005 |
|                                                                                                     | Sex        | 1,837                       | 0,647  | 0,195                     | 2,839  | 0,005 |
|                                                                                                     | Age        | -0,117                      | 0,095  | -0,085                    | -1,231 | 0,220 |
|                                                                                                     | AAA_ODI    | -9,997                      | 13,515 | -0,066                    | -0,740 | 0,460 |
|                                                                                                     | AB_ODI     | -0,258                      | 3,044  | -0,006                    | -0,085 | 0,933 |
|                                                                                                     | Ba_ODI     | 16,704                      | 13,453 | 0,111                     | 1,242  | 0,216 |
|                                                                                                     | Ce_ODI     | -3,943                      | 5,092  | -0,056                    | -0,774 | 0,440 |
|                                                                                                     | Co_ODI     | -10,260                     | 11,210 | -0,076                    | -0,915 | 0,361 |
|                                                                                                     | CAT_ODI    | 8,317                       | 5,577  | 0,103                     | 1,491  | 0,137 |
|                                                                                                     | La_ODI     | -17,034                     | 9,275  | -0,152                    | -1,837 | 0,068 |
|                                                                                                     | PL_ODI     | 3,528                       | 2,727  | 0,089                     | 1,293  | 0,197 |
| a. Dependent Variable: Vulnerability                                                                |            |                             |        |                           |        |       |
| B = unstandardized beta; SE = standard error; $\beta$ = standardized beta; t = t value; p = p value |            |                             |        |                           |        |       |

| Model Summary                                                                                         |                    |          |                   |                    |       |
|-------------------------------------------------------------------------------------------------------|--------------------|----------|-------------------|--------------------|-------|
| Model                                                                                                 | R                  | R Square | Adjusted R Square | SE of the Estimate | $f^2$ |
| 1                                                                                                     | 0,359 <sup>a</sup> | 0,129    | -1,116            | 6,855              | 0,148 |
| a. Predictors: (Constant), Sex, Age, AAA_ISO, AB_ISO, Ba_ISO, Ce_ISO, Co_ISO, CAT_ISO, La_ISO, PL_ISO |                    |          |                   |                    |       |
| R = R value; SE = standard error; $f^2$ = Cohen's $f^2$                                               |                    |          |                   |                    |       |

| ANOVA <sup>a</sup>                                                                                    |            |                |        |             |       |                    |
|-------------------------------------------------------------------------------------------------------|------------|----------------|--------|-------------|-------|--------------------|
| Model                                                                                                 |            | Sum of Squares | df     | Mean Square | F     | p                  |
| 1                                                                                                     | Regression | 48,564         | 10,000 | 4,856       | 0,103 | 0,999 <sup>b</sup> |
|                                                                                                       | Residual   | 328,956        | 7,000  | 46,994      |       |                    |
|                                                                                                       | Total      | 377,520        | 17,000 |             |       |                    |
| a. Dependent Variable: Vulnerability                                                                  |            |                |        |             |       |                    |
| b. Predictors: (Constant), Sex, Age, AAA_ISO, AB_ISO, Ba_ISO, Ce_ISO, Co_ISO, CAT_ISO, La_ISO, PL_ISO |            |                |        |             |       |                    |
| df = degrees of freedom; F = F value; p = p value                                                     |            |                |        |             |       |                    |

| Coefficients <sup>a</sup>                                                                           |            |                             |        |                        |        |       |
|-----------------------------------------------------------------------------------------------------|------------|-----------------------------|--------|------------------------|--------|-------|
| Model                                                                                               |            | Unstandardized Coefficients |        | Standardize            | t      | p     |
|                                                                                                     |            | B                           | SE     | d Coefficients $\beta$ |        |       |
| 1                                                                                                   | (Constant) | 15,968                      | 16,902 |                        | 0,945  | 0,376 |
|                                                                                                     | Sex        | 1,960                       | 3,458  | 0,208                  | 0,567  | 0,589 |
|                                                                                                     | Age        | -0,049                      | 0,501  | -0,035                 | -0,097 | 0,925 |
|                                                                                                     | AAA_ISO    | 5,833                       | 21,303 | 0,115                  | 0,274  | 0,792 |
|                                                                                                     | AB_ISO     | -4,297                      | 17,550 | -0,102                 | -0,245 | 0,814 |
|                                                                                                     | Ba_ISO     | -3,991                      | 21,165 | -0,079                 | -0,189 | 0,856 |
|                                                                                                     | Ce_ISO     | -4,563                      | 12,516 | -0,149                 | -0,365 | 0,726 |
|                                                                                                     | Co_ISO     | 0,728                       | 19,748 | 0,014                  | 0,037  | 0,972 |
|                                                                                                     | CAT_ISO    | 0,108                       | 12,898 | 0,003                  | 0,008  | 0,994 |
|                                                                                                     | La_ISO     | -8,893                      | 19,698 | -0,167                 | -0,451 | 0,665 |
|                                                                                                     | PL_ISO     | -8,100                      | 25,300 | -0,132                 | -0,320 | 0,758 |
| a. Dependent Variable: Vulnerability                                                                |            |                             |        |                        |        |       |
| B = unstandardized beta; SE = standard error; $\beta$ = standardized beta; t = t value; p = p value |            |                             |        |                        |        |       |

|                  |         | Korrelationen |          |         |         |         |         |          |         |         |
|------------------|---------|---------------|----------|---------|---------|---------|---------|----------|---------|---------|
| Controlvariables |         |               | AAA_INVF | AB_INVF | Ba_INVF | Ce_INVF | Co_INVF | CAT_INVF | La_INVF | PI_INVF |
| Sex, Age         | AAA_GMV | r             | -0,022   | -0,060  | 0,081   | 0,086   | 0,102   | 0,155    | -0,128  | 0,172   |
|                  |         | p             | 0,743    | 0,376   | 0,232   | 0,204   | 0,133   | 0,024    | 0,058   | 0,011   |
|                  |         | df            | 217      | 216     | 217     | 217     | 217     | 209      | 217     | 216     |
|                  | AB_GMV  | r             | 0,049    | 0,040   | 0,073   | 0,120   | 0,190   | 0,047    | -0,012  | 0,059   |
|                  |         | p             | 0,467    | 0,557   | 0,283   | 0,077   | 0,005   | 0,498    | 0,863   | 0,387   |
|                  |         | df            | 217      | 216     | 217     | 217     | 217     | 209      | 217     | 216     |
|                  | Ba_GMV  | r             | 0,038    | 0,024   | 0,050   | 0,047   | 0,191   | 0,098    | -0,124  | 0,131   |
|                  |         | p             | 0,573    | 0,730   | 0,459   | 0,485   | 0,004   | 0,155    | 0,067   | 0,053   |
|                  |         | df            | 217      | 216     | 217     | 217     | 217     | 209      | 217     | 216     |
|                  | Ce_GMV  | r             | -0,021   | -0,056  | 0,034   | 0,248   | 0,113   | 0,169    | -0,024  | 0,058   |
|                  |         | p             | 0,763    | 0,410   | 0,621   | 0,000   | 0,096   | 0,014    | 0,726   | 0,396   |
|                  |         | df            | 217      | 216     | 217     | 217     | 217     | 209      | 217     | 216     |
|                  | Co_GMV  | r             | -0,084   | -0,107  | 0,078   | 0,036   | -0,015  | 0,211    | -0,133  | 0,173   |
|                  |         | p             | 0,218    | 0,116   | 0,249   | 0,596   | 0,825   | 0,129    | 0,050   | 0,010   |
|                  |         | df            | 217      | 216     | 217     | 217     | 217     | 209      | 217     | 216     |
|                  | CAT_GMV | r             | 0,045    | -0,008  | 0,089   | 0,032   | 0,099   | 0,084    | -0,054  | 0,166   |
|                  |         | p             | 0,511    | 0,906   | 0,190   | 0,641   | 0,143   | 0,223    | 0,428   | 0,014   |
|                  |         | df            | 217      | 216     | 217     | 217     | 217     | 209      | 217     | 216     |
|                  | La_GMV  | r             | 0,092    | -0,002  | 0,045   | 0,043   | 0,264   | 0,057    | 0,004   | 0,123   |
|                  |         | p             | 0,174    | 0,980   | 0,506   | 0,524   | 0,000   | 0,410    | 0,953   | 0,069   |
|                  |         | df            | 217      | 216     | 217     | 217     | 217     | 209      | 217     | 216     |
|                  | PI_GMV  | r             | 0,052    | 0,054   | -0,017  | -0,034  | 0,194   | 0,076    | -0,100  | 0,112   |
|                  |         | p             | 0,444    | 0,425   | 0,797   | 0,614   | 0,004   | 0,271    | 0,139   | 0,100   |
|                  |         | df            | 217      | 216     | 217     | 217     | 217     | 209      | 217     | 216     |

r= correlation coefficient; p = p value; df = degree of freedom

|                  |         | Korrelationen |        |        |        |        |         |        |        |       |
|------------------|---------|---------------|--------|--------|--------|--------|---------|--------|--------|-------|
| Controlvariables |         | AAA_ODI       | AB_ODI | Ba_ODI | Ce_ODI | Co_ODI | CAT_ODI | La_ODI | PI_ODI |       |
| Sex, Age         | AAA_GMV | r             | 0,178  | -0,039 | -0,087 | 0,194  | 0,140   | 0,017  | -0,139 | 0,073 |
|                  |         | p             | 0,008  | 0,562  | 0,198  | 0,004  | 0,038   | 0,804  | 0,039  | 0,281 |
|                  |         | df            | 217    | 216    | 217    | 217    | 217     | 209    | 217    | 216   |
|                  | AB_GMV  | r             | 0,079  | 0,078  | -0,050 | 0,137  | 0,105   | -0,013 | -0,093 | 0,023 |
|                  |         | p             | 0,241  | 0,250  | 0,459  | 0,043  | 0,122   | 0,850  | 0,172  | 0,739 |
|                  |         | df            | 217    | 216    | 217    | 217    | 217     | 209    | 217    | 216   |
|                  | Ba_GMV  | r             | 0,140  | 0,021  | -0,078 | 0,130  | 0,209   | -0,055 | -0,212 | 0,038 |
|                  |         | p             | 0,038  | 0,753  | 0,252  | 0,055  | 0,002   | 0,425  | 0,002  | 0,575 |
|                  |         | df            | 217    | 216    | 217    | 217    | 217     | 209    | 217    | 216   |
|                  | Ce_GMV  | r             | -0,031 | -0,009 | -0,069 | 0,136  | 0,083   | -0,053 | -0,139 | 0,013 |
|                  |         | p             | 0,646  | 0,894  | 0,307  | 0,044  | 0,222   | 0,443  | 0,040  | 0,852 |
|                  |         | df            | 217    | 216    | 217    | 217    | 217     | 209    | 217    | 216   |
|                  | Co_GMV  | r             | 0,173  | -0,082 | -0,087 | 0,192  | -0,030  | 0,056  | -0,037 | 0,078 |
|                  |         | p             | 0,010  | 0,231  | 0,199  | 0,004  | 0,659   | 0,416  | 0,589  | 0,252 |
|                  |         | df            | 217    | 216    | 217    | 217    | 217     | 209    | 217    | 216   |
|                  | CAT_GMV | r             | 0,046  | -0,032 | -0,128 | 0,080  | 0,103   | 0,003  | -0,151 | 0,096 |
|                  |         | p             | 0,503  | 0,638  | 0,059  | 0,241  | 0,130   | 0,963  | 0,026  | 0,160 |
|                  |         | df            | 217    | 216    | 217    | 217    | 217     | 209    | 217    | 216   |
|                  | La_GMV  | r             | 0,047  | -0,020 | -0,145 | 0,080  | 0,119   | -0,065 | -0,242 | 0,028 |
|                  |         | p             | 0,491  | 0,766  | 0,032  | 0,238  | 0,079   | 0,348  | 0,000  | 0,677 |
|                  |         | df            | 217    | 216    | 217    | 217    | 217     | 209    | 217    | 216   |
|                  | PI_GMV  | r             | 0,063  | 0,000  | -0,116 | 0,024  | 0,208   | -0,103 | -0,267 | 0,017 |
|                  |         | p             | 0,351  | 1,000  | 0,087  | 0,728  | 0,002   | 0,136  | 0,000  | 0,800 |
|                  |         | df            | 217    | 216    | 217    | 217    | 217     | 209    | 217    | 216   |

r= correlation coefficient; p = p value; df = degree of freedom
